# Supplementary material for: Checklist of British and Irish Hymenoptera - Platygastroidea
Source: Biodivers Data J. 2016 Apr 22;(4):e7991. doi: 10.3897/BDJ.4.e7991 (PMC4881931; doi:10.3897/BDJ.4.e7991)
Supplement: Supplementary material 1 — Checklist of British and Irish Platygastroidea [file biodiversity_data_journal-4-e7991-s001.xlsx]

## Sheet: Sheet1
Taxon_Local_ID	Kingdom	Subkingdom	Phylum	Subphylum	Superclass	Class	Subclass	Superorder	Order	Suborder	Infraorder	Superfamily	Family	Subfamily	Tribe	Subtribe	Genus	Subgenus	Species	Subspecies	Variety	Form	Authorship	Nomenclature	Feeds on	Symbiotic with	Parasite of	Host of	Native Status	Conservation Status	Distribution	Horizon	Notes
83001	Animalia		Arthropoda			Insecta			Hymenoptera			PLATYGASTROIDEA
83002	Animalia		Arthropoda			Insecta			Hymenoptera			PLATYGASTROIDEA	Platygastridae										Haliday, 1833
83003	Animalia		Arthropoda			Insecta			Hymenoptera			PLATYGASTROIDEA	Platygastridae	Platygastrinae									Haliday, 1833										Buhl &amp; Notton (2009) revised the British and Irish checklist of Platygastrinae and Sceliotrachelinae (i.e. the traditional Platygastridae) and this forms the basis for the nomenclature and distribution data recorded here. Additional records from Buhl &amp; O’Connor (2010b,c, 2011b, 2012b,c) and a few from PB. Dates of description and original combinations follow Vlug (1995).
83004	Animalia		Arthropoda			Insecta			Hymenoptera			PLATYGASTROIDEA	Platygastridae	Platygastrinae			Acerotella						Masner, 1964
83005	Animalia		Arthropoda			Insecta			Hymenoptera			PLATYGASTROIDEA	Platygastridae	Platygastrinae			Acerotella		boter				(Walker, 1838)	<p style="margin-left: 40px;"><i>Inostemma boter </i>Walker, 1838</p>							Ireland, Isle of Man
83006	Animalia		Arthropoda			Insecta			Hymenoptera			PLATYGASTROIDEA	Platygastridae	Platygastrinae			Acerotella		humilis				(Kieffer, 1913)	<p style="margin-left: 40px;"><i>Acerota humilis </i>Kieffer, 1913</p>							Ireland		added by Buhl &amp; O’Connor (2012c)
83007	Animalia		Arthropoda			Insecta			Hymenoptera			PLATYGASTROIDEA	Platygastridae	Platygastrinae			Amblyaspis						Förster, 1856
83008	Animalia		Arthropoda			Insecta			Hymenoptera			PLATYGASTROIDEA	Platygastridae	Platygastrinae			Amblyaspis		abas				(Walker, 1835)	<p style="margin-left: 40px;"><i>Platygaster abas </i>Walker, 1835</p>							England, Scotland
83009	Animalia		Arthropoda			Insecta			Hymenoptera			PLATYGASTROIDEA	Platygastridae	Platygastrinae			Amblyaspis		belus				(Walker, 1835)	<p style="margin-left: 40px;"><i>Platygaster belus </i>Walker, 1835</p>							Ireland
83010	Animalia		Arthropoda			Insecta			Hymenoptera			PLATYGASTROIDEA	Platygastridae	Platygastrinae			Amblyaspis		crates				(Walker, 1835)	<p style="margin-left: 40px;"><i>Platygaster crates </i>Walker, 1835</p>							England, Ireland, Isle of Man
83011	Animalia		Arthropoda			Insecta			Hymenoptera			PLATYGASTROIDEA	Platygastridae	Platygastrinae			Amblyaspis		nereus				(Walker, 1835)	<p style="margin-left: 40px;"><i>Platygaster nereus </i>Walker, 1835</p>							England, Ireland
83012	Animalia		Arthropoda			Insecta			Hymenoptera			PLATYGASTROIDEA	Platygastridae	Platygastrinae			Amblyaspis		otreus				(Walker, 1835)	<p style="margin-left: 40px;"><i>Platygaster otreus </i>Walker, 1835</p>							England, Scotland Ireland, Isle of Man
83013	Animalia		Arthropoda			Insecta			Hymenoptera			PLATYGASTROIDEA	Platygastridae	Platygastrinae			Amblyaspis		prorsa				(Walker, 1835)	<p style="margin-left: 40px;"><i>Platygaster prorsa </i>Walker, 1835</p>							England, Scotland Ireland, Isle of Man
83014	Animalia		Arthropoda			Insecta			Hymenoptera			PLATYGASTROIDEA	Platygastridae	Platygastrinae			Amblyaspis		roboris				(Haliday, 1835)	<p style="margin-left: 40px;"><i>Platygaster roboris </i>Haliday, 1835</p><p style="margin-left: 40px;"><i>lasiophila</i> Kieffer, 1913 </p>							England, Ireland, Isle of Man
83015	Animalia		Arthropoda			Insecta			Hymenoptera			PLATYGASTROIDEA	Platygastridae	Platygastrinae			Amblyaspis		rufistilus				Kieffer, 1913								Scotland
83016	Animalia		Arthropoda			Insecta			Hymenoptera			PLATYGASTROIDEA	Platygastridae	Platygastrinae			Amblyaspis		rufithorax				Kieffer, 1913								England
83017	Animalia		Arthropoda			Insecta			Hymenoptera			PLATYGASTROIDEA	Platygastridae	Platygastrinae			Amblyaspis		rufiventris				Kieffer, 1913								Scotland
83018	Animalia		Arthropoda			Insecta			Hymenoptera			PLATYGASTROIDEA	Platygastridae	Platygastrinae			Amblyaspis		rufopetiolata				Kieffer, 1913								England		PB regards rufopetiolata as a valid species, not a subspecies of lasiophila, although he has not seen the type.
83019	Animalia		Arthropoda			Insecta			Hymenoptera			PLATYGASTROIDEA	Platygastridae	Platygastrinae			Amblyaspis		scelionoides				(Haliday, 1835)	<p style="margin-left: 40px;"><i>Platygaster scelionoides </i>Haliday, 1835</p><p style="margin-left: 40px;"><i>furius</i> (Walker, 1835, <i>Platygaster</i>) </p><p style="margin-left: 40px;"><i>fuscicornis</i> Thomson, 1859 </p>							England, Ireland, Isle of Man
83020	Animalia		Arthropoda			Insecta			Hymenoptera			PLATYGASTROIDEA	Platygastridae	Platygastrinae			Amblyaspis		scutellaris				Kieffer, 1904								England		British specimens have been assigned to the subspecies hyalina Kieffer, 1914 (Buhl &amp; Notton, 2009).
83021	Animalia		Arthropoda			Insecta			Hymenoptera			PLATYGASTROIDEA	Platygastridae	Platygastrinae			Amblyaspis		tritici				(Walker, 1835)	<p style="margin-left: 40px;"><i>Platygaster tritici </i>Walker, 1835</p>							England, Scotland, Ireland
83022	Animalia		Arthropoda			Insecta			Hymenoptera			PLATYGASTROIDEA	Platygastridae	Platygastrinae			Amblyaspis		vestina				(Walker, 1835)	<p style="margin-left: 40px;"><i>Platygaster vestinus </i>Walker, 1835</p>							England
83023	Animalia		Arthropoda			Insecta			Hymenoptera			PLATYGASTROIDEA	Platygastridae	Platygastrinae			Amblyaspis		vitellinipes				Kieffer, 1913								Scotland
83024	Animalia		Arthropoda			Insecta			Hymenoptera			PLATYGASTROIDEA	Platygastridae	Platygastrinae			Anopedias						Förster, 1856
83025	Animalia		Arthropoda			Insecta			Hymenoptera			PLATYGASTROIDEA	Platygastridae	Platygastrinae			Anopedias		lacustris				Kieffer, 1926								England, Scotland, Wales, Ireland, Isle of Man		added by O'Connor et al. (2004)
83026	Animalia		Arthropoda			Insecta			Hymenoptera			PLATYGASTROIDEA	Platygastridae	Platygastrinae			Anopedias		sundholmi				Huggert, 1974								England		added by Buhl &amp; Notton (2009)
83027	Animalia		Arthropoda			Insecta			Hymenoptera			PLATYGASTROIDEA	Platygastridae	Platygastrinae			Anopedias		tritomus				Thomson, 1859								England		added by Buhl &amp; Notton (2009)
83028	Animalia		Arthropoda			Insecta			Hymenoptera			PLATYGASTROIDEA	Platygastridae	Platygastrinae			Ceratacis						Thomson, 1859
83029	Animalia		Arthropoda			Insecta			Hymenoptera			PLATYGASTROIDEA	Platygastridae	Platygastrinae			Ceratacis		cochleata				(Walker, 1835)	<p style="margin-left: 40px;"><i>Platygaster cochleatus </i>Walker, 1835</p><p style="margin-left: 40px;"><i>filicornis</i> (Haliday, 1835, <i>Platygaster</i>) </p><p style="margin-left: 40px;"><i>munki</i> (Buhl, 1994, <i>Platygaster</i>) </p>							England, Scotland, Wales, Ireland, Isle of Man
83030	Animalia		Arthropoda			Insecta			Hymenoptera			PLATYGASTROIDEA	Platygastridae	Platygastrinae			Ceratacis		flavipes				Thomson, 1859								England, Scotland, Ireland		added by Buhl &amp; Notton (2009)
83031	Animalia		Arthropoda			Insecta			Hymenoptera			PLATYGASTROIDEA	Platygastridae	Platygastrinae			Ceratacis		laricis				(Haliday, 1835)	<p style="margin-left: 40px;"><i>Platygaster laricis </i>Haliday, 1835</p>							England, Scotland, Wales, Ireland
83032	Animalia		Arthropoda			Insecta			Hymenoptera			PLATYGASTROIDEA	Platygastridae	Platygastrinae			Euxestonotus						Fouts, 1925	<p style="margin-left: 40px;"><i>XESTONOTUS</i> Förster, 1856 preocc.</p><p style="margin-left: 40px;"><i>AXESTONOTUS</i> Kieffer, 1926 </p><p style="margin-left: 40px;"><i>EOXESTONOTUS</i> Debauche, 1947 </p>
83033	Animalia		Arthropoda			Insecta			Hymenoptera			PLATYGASTROIDEA	Platygastridae	Platygastrinae			Euxestonotus		clavicornis				Buhl, 1995								England, Scotland		added by Buhl &amp; Notton (2009)
83034	Animalia		Arthropoda			Insecta			Hymenoptera			PLATYGASTROIDEA	Platygastridae	Platygastrinae			Euxestonotus		error				(Fitch, 1861)	<p style="margin-left: 40px;"><i>Platygaster error </i>Fitch, 1861</p>							England, Scotland, Ireland, Isle of Man		added by Milne (1960). Overlooked by Fergusson (1978) and by Buhl &amp; Notton (2009).
83035	Animalia		Arthropoda			Insecta			Hymenoptera			PLATYGASTROIDEA	Platygastridae	Platygastrinae			Euxestonotus		hasselbalchi				Buhl, 1995								England, Wales, Ireland, Isle of Man		added by Buhl (1995a)
83036	Animalia		Arthropoda			Insecta			Hymenoptera			PLATYGASTROIDEA	Platygastridae	Platygastrinae			Euxestonotus		parallelus				Kieffer, 1913								Scotland
83037	Animalia		Arthropoda			Insecta			Hymenoptera			PLATYGASTROIDEA	Platygastridae	Platygastrinae			Gastrotrypes						Brues, 1922
83038	Animalia		Arthropoda			Insecta			Hymenoptera			PLATYGASTROIDEA	Platygastridae	Platygastrinae			Gastrotrypes		spatulatus				Brues, 1922								England		added by Buhl &amp; Notton (2009)
83039	Animalia		Arthropoda			Insecta			Hymenoptera			PLATYGASTROIDEA	Platygastridae	Platygastrinae			Inostemma						Haliday, 1833	<p style="margin-left: 40px;"><i>PSILUS</i> Jurine, 1807 preocc.</p><p style="margin-left: 40px;"><i>ACEROTA</i> Förster, 1856 </p><p style="margin-left: 40px;"><i>CERATOPSILUS</i> Kieffer, 1913 </p><p style="margin-left: 40px;"><i>BRACHINOSTEMMA</i> Kieffer, 1916 </p><p style="margin-left: 40px;"><i>INOCEROTA</i> Szelényi, 1938 </p>
83040	Animalia		Arthropoda			Insecta			Hymenoptera			PLATYGASTROIDEA	Platygastridae	Platygastrinae			Inostemma		boscii				(Jurine, 1807)	<p style="margin-left: 40px;"><i>Psilus boscii </i>Jurine, 1807</p>							Ireland, Isle of Man
83041	Animalia		Arthropoda			Insecta			Hymenoptera			PLATYGASTROIDEA	Platygastridae	Platygastrinae			Inostemma		curtum				Szelényi, 1938								England, Ireland		added by O'Connor et al. (2004)
83042	Animalia		Arthropoda			Insecta			Hymenoptera			PLATYGASTROIDEA	Platygastridae	Platygastrinae			Inostemma		favo				Walker, 1838								Ireland
83043	Animalia		Arthropoda			Insecta			Hymenoptera			PLATYGASTROIDEA	Platygastridae	Platygastrinae			Inostemma		frivaldskyi				Szelényi, 1938								Ireland		added by Buhl &amp; O’Connor (2011b)
83044	Animalia		Arthropoda			Insecta			Hymenoptera			PLATYGASTROIDEA	Platygastridae	Platygastrinae			Inostemma		hispo				Walker, 1838								England, Ireland
83045	Animalia		Arthropoda			Insecta			Hymenoptera			PLATYGASTROIDEA	Platygastridae	Platygastrinae			Inostemma		hyperici				Debauche, 1947								Ireland		added by O'Connor et al. (2004). Buhl &amp; Notton (2009) record specimens tentatively identified as hyperici from England and Scotland.
83046	Animalia		Arthropoda			Insecta			Hymenoptera			PLATYGASTROIDEA	Platygastridae	Platygastrinae			Inostemma		lycon				Walker, 1835								England
83047	Animalia		Arthropoda			Insecta			Hymenoptera			PLATYGASTROIDEA	Platygastridae	Platygastrinae			Inostemma		melicerta				Walker, 1835								England, Ireland
83048	Animalia		Arthropoda			Insecta			Hymenoptera			PLATYGASTROIDEA	Platygastridae	Platygastrinae			Inostemma		menippus				Walker, 1835								England
83049	Animalia		Arthropoda			Insecta			Hymenoptera			PLATYGASTROIDEA	Platygastridae	Platygastrinae			Inostemma		mosellanae				Vlug, 1991								England		added by Buhl &amp; Notton (2009)
83050	Animalia		Arthropoda			Insecta			Hymenoptera			PLATYGASTROIDEA	Platygastridae	Platygastrinae			Inostemma		piricola				Kieffer, 1906								England		added by Barnes (1948). Omitted by Fergusson (1978).
83051	Animalia		Arthropoda			Insecta			Hymenoptera			PLATYGASTROIDEA	Platygastridae	Platygastrinae			Inostemma		reticulatum				Szelényi, 1938								England		added by Buhl &amp; Notton (2009)
83052	Animalia		Arthropoda			Insecta			Hymenoptera			PLATYGASTROIDEA	Platygastridae	Platygastrinae			Inostemma		spinulosum				Kieffer, 1916								England, Ireland
83053	Animalia		Arthropoda			Insecta			Hymenoptera			PLATYGASTROIDEA	Platygastridae	Platygastrinae			Inostemma		walkeri				Kieffer, 1914								England, Scotland, Ireland
83054	Animalia		Arthropoda			Insecta			Hymenoptera			PLATYGASTROIDEA	Platygastridae	Platygastrinae			Iphitrachelus						Haliday, 1835
83055	Animalia		Arthropoda			Insecta			Hymenoptera			PLATYGASTROIDEA	Platygastridae	Platygastrinae			Iphitrachelus		gracilis				Masner, 1957								England
83056	Animalia		Arthropoda			Insecta			Hymenoptera			PLATYGASTROIDEA	Platygastridae	Platygastrinae			Iphitrachelus		lar				Haliday, 1835								England, Scotland, Ireland, Isle of Man
83057	Animalia		Arthropoda			Insecta			Hymenoptera			PLATYGASTROIDEA	Platygastridae	Platygastrinae			Isocybus						Förster, 1856
83058	Animalia		Arthropoda			Insecta			Hymenoptera			PLATYGASTROIDEA	Platygastridae	Platygastrinae			Isocybus		ascendens				Kieffer, 1913								Scotland
83059	Animalia		Arthropoda			Insecta			Hymenoptera			PLATYGASTROIDEA	Platygastridae	Platygastrinae			Isocybus		cameroni				Kieffer, 1913								Scotland
83060	Animalia		Arthropoda			Insecta			Hymenoptera			PLATYGASTROIDEA	Platygastridae	Platygastrinae			Isocybus		compressus				Kieffer, 1913								Scotland
83061	Animalia		Arthropoda			Insecta			Hymenoptera			PLATYGASTROIDEA	Platygastridae	Platygastrinae			Isocybus		cotta				(Walker, 1835)	<p style="margin-left: 40px;"><i>Platygaster cotta </i>Walker, 1835</p>							England, Scotland
83062	Animalia		Arthropoda			Insecta			Hymenoptera			PLATYGASTROIDEA	Platygastridae	Platygastrinae			Isocybus		erato				(Walker, 1835)	<p style="margin-left: 40px;"><i>Platygaster erato </i>Walker, 1835</p>							England, Ireland
83063	Animalia		Arthropoda			Insecta			Hymenoptera			PLATYGASTROIDEA	Platygastridae	Platygastrinae			Isocybus		grandis				(Nees, 1834)	<p style="margin-left: 40px;"><i>Platygaster grandis </i>Nees, 1834</p>							England
83064	Animalia		Arthropoda			Insecta			Hymenoptera			PLATYGASTROIDEA	Platygastridae	Platygastrinae			Isocybus		horizontalis				Kieffer, 1913								Scotland
83065	Animalia		Arthropoda			Insecta			Hymenoptera			PLATYGASTROIDEA	Platygastridae	Platygastrinae			Isocybus		matuta				(Walker, 1835)	<p style="margin-left: 40px;"><i>Platygaster matuta </i>Walker, 1835</p>							England
83066	Animalia		Arthropoda			Insecta			Hymenoptera			PLATYGASTROIDEA	Platygastridae	Platygastrinae			Isocybus		pyramidalis				Kieffer, 1913								Scotland
83067	Animalia		Arthropoda			Insecta			Hymenoptera			PLATYGASTROIDEA	Platygastridae	Platygastrinae			Isocybus		trochanteratus				Thomson, 1859
83068	Animalia		Arthropoda			Insecta			Hymenoptera			PLATYGASTROIDEA	Platygastridae	Platygastrinae			Isocybus		walkeri				Kieffer, 1926								England, Scotland, Ireland
83069	Animalia		Arthropoda			Insecta			Hymenoptera			PLATYGASTROIDEA	Platygastridae	Platygastrinae			Isostasius						Förster, 1856	<p style="margin-left: 40px;"><i>MONOCRITA</i> Förster, 1856 </p><p style="margin-left: 40px;"><i>TRISINOSTEMMA</i> Kieffer, 1914 </p>
83070	Animalia		Arthropoda			Insecta			Hymenoptera			PLATYGASTROIDEA	Platygastridae	Platygastrinae			Isostasius		inserens				(Kirby, 1800)	<p style="margin-left: 40px;"><i>Ichneumon inserens </i>Kirby, 1800</p>							England
83071	Animalia		Arthropoda			Insecta			Hymenoptera			PLATYGASTROIDEA	Platygastridae	Platygastrinae			Isostasius		punctiger				(Nees, 1834)	<p style="margin-left: 40px;"><i>Platygaster punctiger </i>Nees, 1834</p><p style="margin-left: 40px;"><i>atinus</i> (Walker, 1835, <i>Inostemma</i>) </p><p style="margin-left: 40px;"><i>scrutator</i> (Walker, 1835, <i>Inostemma</i>) </p>							England, Ireland
83072	Animalia		Arthropoda			Insecta			Hymenoptera			PLATYGASTROIDEA	Platygastridae	Platygastrinae			Isostasius		sp.												England, Wales		Recorded by Buhl &amp; Notton (2009) as Isostasius inserens sensu Kozlov,1978, not inserens (Kirby, 1800).
83073	Animalia		Arthropoda			Insecta			Hymenoptera			PLATYGASTROIDEA	Platygastridae	Platygastrinae			Leptacis						Förster, 1856	<p style="margin-left: 40px;"><i>MIRAMBLYASPIS</i> Dodd, 1914 </p><p style="margin-left: 40px;"><i>PROSAMBLYASPIS</i> Kieffer, 1926 </p>
83074	Animalia		Arthropoda			Insecta			Hymenoptera			PLATYGASTROIDEA	Platygastridae	Platygastrinae			Leptacis		ariadne				Buhl, 1999								England		added by Buhl &amp; Notton (2009)
83075	Animalia		Arthropoda			Insecta			Hymenoptera			PLATYGASTROIDEA	Platygastridae	Platygastrinae			Leptacis		coryphe				Buhl, 1998								Ireland		added by Buhl &amp; Notton (2009)
83076	Animalia		Arthropoda			Insecta			Hymenoptera			PLATYGASTROIDEA	Platygastridae	Platygastrinae			Leptacis		halia				(Walker, 1835)	<p style="margin-left: 40px;"><i>Platygaster halia </i>Walker, 1835</p>							England, Ireland
83077	Animalia		Arthropoda			Insecta			Hymenoptera			PLATYGASTROIDEA	Platygastridae	Platygastrinae			Leptacis		laodice				(Walker, 1835)	<p style="margin-left: 40px;"><i>Platygaster laodice </i>Walker, 1835</p><p style="margin-left: 40px;"><i>buchi</i> Buhl, 1997 </p>							England, Ireland, Isle of Man
83078	Animalia		Arthropoda			Insecta			Hymenoptera			PLATYGASTROIDEA	Platygastridae	Platygastrinae			Leptacis		lignicola				Kieffer, 1916								England		added by Buhl &amp; Notton (2009)
83079	Animalia		Arthropoda			Insecta			Hymenoptera			PLATYGASTROIDEA	Platygastridae	Platygastrinae			Leptacis		nice				(Walker, 1835)	<p style="margin-left: 40px;"><i>Platygaster nice </i>Walker, 1835</p>							England
83080	Animalia		Arthropoda			Insecta			Hymenoptera			PLATYGASTROIDEA	Platygastridae	Platygastrinae			Leptacis		nydia				(Walker, 1835)	<p style="margin-left: 40px;"><i>Platygaster nydia </i>Walker, 1835</p><p style="margin-left: 40px;"><i>torispinula</i> Huggert, 1980 </p>							England
83081	Animalia		Arthropoda			Insecta			Hymenoptera			PLATYGASTROIDEA	Platygastridae	Platygastrinae			Leptacis		orchymonti				(Debauche, 1947)	<p style="margin-left: 40px;"><i>Anacoryphe orchymonti </i>Debauche, 1947</p><p style="margin-left: 40px;"><i>Leptacis</i> </p>							England, Wales, Ireland, Isle of Man
83082	Animalia		Arthropoda			Insecta			Hymenoptera			PLATYGASTROIDEA	Platygastridae	Platygastrinae			Leptacis		ozines				(Walker, 1835)	<p style="margin-left: 40px;"><i>Platygaster ozines </i>Walker, 1835</p>							England, Wales, Ireland, Isle of Man
83083	Animalia		Arthropoda			Insecta			Hymenoptera			PLATYGASTROIDEA	Platygastridae	Platygastrinae			Leptacis		tipulae				(Kirby, 1798)	<p style="margin-left: 40px;"><i>Ichneumon tipulae </i>Kirby, 1798</p><p style="margin-left: 40px;"><i>scutellaris</i> (Nees, 1834, <i>Platygaster</i>) </p>							England, Ireland, Isle of Man
83084	Animalia		Arthropoda			Insecta			Hymenoptera			PLATYGASTROIDEA	Platygastridae	Platygastrinae			Leptacis		tripartita				(Kieffer, 1913)	<p style="margin-left: 40px;"><i>Amblyaspis tripartitus </i>Kieffer, 1913</p>							Scotland
83085	Animalia		Arthropoda			Insecta			Hymenoptera			PLATYGASTROIDEA	Platygastridae	Platygastrinae			Leptacis		vlugi				Buhl, 1997								England, Ireland, Isle of Man		added by Buhl &amp; Bennett (2009)
83086	Animalia		Arthropoda			Insecta			Hymenoptera			PLATYGASTROIDEA	Platygastridae	Platygastrinae			Metaclisis						Förster, 1856	<p style="margin-left: 40px;"><i>PARINOSTEMMA</i> Kieffer, 1914</p>
83087	Animalia		Arthropoda			Insecta			Hymenoptera			PLATYGASTROIDEA	Platygastridae	Platygastrinae			Metaclisis		areolata				(Haliday, 1835)	<p style="margin-left: 40px;"><i>Inostemma areolata </i>Haliday, 1835</p>							Ireland
83088	Animalia		Arthropoda			Insecta			Hymenoptera			PLATYGASTROIDEA	Platygastridae	Platygastrinae			Metaclisis		montagnei				Maneval, 1936								England, Scotland, Ireland		added by Buhl &amp; Notton (2009)
83089	Animalia		Arthropoda			Insecta			Hymenoptera			PLATYGASTROIDEA	Platygastridae	Platygastrinae			Metaclisis		ocalea				(Walker, 1838)	<p style="margin-left: 40px;"><i>Inostemma ocalea </i>Walker, 1838</p>							England
83090	Animalia		Arthropoda			Insecta			Hymenoptera			PLATYGASTROIDEA	Platygastridae	Platygastrinae			Metaclisis		phragmitis				Debauche, 1947								England, Scotland, Wales		added by Buhl &amp; Notton (2009)
83091	Animalia		Arthropoda			Insecta			Hymenoptera			PLATYGASTROIDEA	Platygastridae	Platygastrinae			Metanopedias						Brues, 1910	<p style="margin-left: 40px;"><i>DISYNOPEAS</i> Kieffer, 1916</p>
83092	Animalia		Arthropoda			Insecta			Hymenoptera			PLATYGASTROIDEA	Platygastridae	Platygastrinae			Metanopedias		lasiopterae				(Kieffer, 1916)	<p style="margin-left: 40px;"><i>Disynopeas lasiopterae </i>Kieffer, 1916</p><p style="margin-left: 40px;"><i>britannicus</i> Jackson, 1966 </p>							England
83093	Animalia		Arthropoda			Insecta			Hymenoptera			PLATYGASTROIDEA	Platygastridae	Platygastrinae			Piestopleura						Förster, 1856
83094	Animalia		Arthropoda			Insecta			Hymenoptera			PLATYGASTROIDEA	Platygastridae	Platygastrinae			Piestopleura		catillus				(Walker, 1835)	<p style="margin-left: 40px;"><i>Platygaster catillus </i>Walker, 1835</p>							England, Ireland
83095	Animalia		Arthropoda			Insecta			Hymenoptera			PLATYGASTROIDEA	Platygastridae	Platygastrinae			Piestopleura		flavimanus				Kieffer, 1926								England
83096	Animalia		Arthropoda			Insecta			Hymenoptera			PLATYGASTROIDEA	Platygastridae	Platygastrinae			Piestopleura		mamertes				(Walker, 1835)	<p style="margin-left: 40px;"><i>Platygaster mamertes </i>Walker, 1835</p>							England, Ireland
83097	Animalia		Arthropoda			Insecta			Hymenoptera			PLATYGASTROIDEA	Platygastridae	Platygastrinae			Piestopleura		seron				(Walker, 1835)	<p style="margin-left: 40px;"><i>Platygaster seron </i>Walker, 1835</p>							England, Ireland
83098	Animalia		Arthropoda			Insecta			Hymenoptera			PLATYGASTROIDEA	Platygastridae	Platygastrinae			Platygaster						Latreille, 1809	<p style="margin-left: 40px;"><i>RHACODIA</i> Panzer, 1838</p><p style="margin-left: 40px;"><i>HYPOCAMPSIS</i> Förster, 1856</p><p style="margin-left: 40px;"><i>POLYGNOTUS</i> Förster, 1856</p><p style="margin-left: 40px;"><i>ANEURHYNCHUS</i> Provancher, 1887</p><p style="margin-left: 40px;"><i>COELOPELTA</i> Ashmead, 1893</p><p style="margin-left: 40px;"><i>ANEURON</i> Brues, 1910</p><p style="m…
83099	Animalia		Arthropoda			Insecta			Hymenoptera			PLATYGASTROIDEA	Platygastridae	Platygastrinae			Platygaster	Huggertella					Notton, 2006	<p style="margin-left: 40px;"><i>CYLINDROGASTER</i> Huggert, 1980</p>
83100	Animalia		Arthropoda			Insecta			Hymenoptera			PLATYGASTROIDEA	Platygastridae	Platygastrinae			Platygaster	Huggertella	tubulosa				Brues, 1922								England, Isle of Man		NHM, det. PB.; added by Notton (2006)
83101	Animalia		Arthropoda			Insecta			Hymenoptera			PLATYGASTROIDEA	Platygastridae	Platygastrinae			Platygaster	Parallelogaster					Huggert, 1973
83102	Animalia		Arthropoda			Insecta			Hymenoptera			PLATYGASTROIDEA	Platygastridae	Platygastrinae			Platygaster	Parallelogaster	lamelliformis				Huggert, 1973								England, Scotland, Wales		added by Notton (2006)
83103	Animalia		Arthropoda			Insecta			Hymenoptera			PLATYGASTROIDEA	Platygastridae	Platygastrinae			Platygaster	Platygaster					Latreille, 1809
83104	Animalia		Arthropoda			Insecta			Hymenoptera			PLATYGASTROIDEA	Platygastridae	Platygastrinae			Platygaster	Platygaster	abia				Walker, 1835								England, Scotland
83105	Animalia		Arthropoda			Insecta			Hymenoptera			PLATYGASTROIDEA	Platygastridae	Platygastrinae			Platygaster	Platygaster	abisares				Walker, 1835	<p style="margin-left: 40px;"><i>cleodaeus</i> Walker, 1835 </p>							England, Ireland
83106	Animalia		Arthropoda			Insecta			Hymenoptera			PLATYGASTROIDEA	Platygastridae	Platygastrinae			Platygaster	Platygaster	abrupta				Buhl, 1994								England		added by Buhl (1995b)
83107	Animalia		Arthropoda			Insecta			Hymenoptera			PLATYGASTROIDEA	Platygastridae	Platygastrinae			Platygaster	Platygaster	acrisius				Walker, 1835								England, Ireland
83108	Animalia		Arthropoda			Insecta			Hymenoptera			PLATYGASTROIDEA	Platygastridae	Platygastrinae			Platygaster	Platygaster	aebeloeensis				Buhl, 2001								England, Wales, Ireland, Isle of Man		added by Buhl &amp; O'Connor (2009), Buhl &amp; Bennett (2009)
83109	Animalia		Arthropoda			Insecta			Hymenoptera			PLATYGASTROIDEA	Platygastridae	Platygastrinae			Platygaster	Platygaster	aegeus				Walker, 1835								England, Ireland, Isle of Man
83110	Animalia		Arthropoda			Insecta			Hymenoptera			PLATYGASTROIDEA	Platygastridae	Platygastrinae			Platygaster	Platygaster	anglica				Buhl, 2009								England		added by Buhl (2009a)
83111	Animalia		Arthropoda			Insecta			Hymenoptera			PLATYGASTROIDEA	Platygastridae	Platygastrinae			Platygaster	Platygaster	?anopediana				Buhl, 2005								England		recorded by Buhl &amp; Notton (2009)
83112	Animalia		Arthropoda			Insecta			Hymenoptera			PLATYGASTROIDEA	Platygastridae	Platygastrinae			Platygaster	Platygaster	ashei				Buhl &amp; O’Connor, 2012								Ireland		added by Buhl &amp; O’Connor (2012a)
83113	Animalia		Arthropoda			Insecta			Hymenoptera			PLATYGASTROIDEA	Platygastridae	Platygastrinae			Platygaster	Platygaster	athamas				Walker, 1835								England, Scotland, Ireland
83114	Animalia		Arthropoda			Insecta			Hymenoptera			PLATYGASTROIDEA	Platygastridae	Platygastrinae			Platygaster	Platygaster	betulae				(Kieffer, 1916)	<p style="margin-left: 40px;"><i>Misocyclops betulae </i>Kieffer, 1916</p>							England, Wales, Ireland		added by Buhl &amp; O'Connor (2009)
83115	Animalia		Arthropoda			Insecta			Hymenoptera			PLATYGASTROIDEA	Platygastridae	Platygastrinae			Platygaster	Platygaster	betularia				Kieffer, 1916								England, Scotland, Ireland		added by Buhl &amp; Notton (2009)
83116	Animalia		Arthropoda			Insecta			Hymenoptera			PLATYGASTROIDEA	Platygastridae	Platygastrinae			Platygaster	Platygaster	breviscapa				Buhl, 2009								England		added by Buhl &amp; Notton (2009)
83117	Animalia		Arthropoda			Insecta			Hymenoptera			PLATYGASTROIDEA	Platygastridae	Platygastrinae			Platygaster	Platygaster	bucolion				Walker, 1835								England
83118	Animalia		Arthropoda			Insecta			Hymenoptera			PLATYGASTROIDEA	Platygastridae	Platygastrinae			Platygaster	Platygaster	cebes				Walker, 1835	<p style="margin-left: 40px;"><i>cratinus</i> Walker, 1835 </p><p style="margin-left: 40px;"><i>olorus</i> Walker, 1835 </p>							England, Scotland, Wales, Isle of Man
83119	Animalia		Arthropoda			Insecta			Hymenoptera			PLATYGASTROIDEA	Platygastridae	Platygastrinae			Platygaster	Platygaster	cecidomyiae				Ratzeburg, 1852								England
83120	Animalia		Arthropoda			Insecta			Hymenoptera			PLATYGASTROIDEA	Platygastridae	Platygastrinae			Platygaster	Platygaster	chloropus				Thomson, 1859								England, Ireland		added by Buhl &amp; O'Connor (2009)
83121	Animalia		Arthropoda			Insecta			Hymenoptera			PLATYGASTROIDEA	Platygastridae	Platygastrinae			Platygaster	Platygaster	chrysippus				Walker, 1835								England
83122	Animalia		Arthropoda			Insecta			Hymenoptera			PLATYGASTROIDEA	Platygastridae	Platygastrinae			Platygaster	Platygaster	clavata				Buhl, 1994								Scotland, Wales		added by Buhl &amp; Notton (2009)
83123	Animalia		Arthropoda			Insecta			Hymenoptera			PLATYGASTROIDEA	Platygastridae	Platygastrinae			Platygaster	Platygaster	compressicornis				Thomson, 1859	<p style="margin-left: 40px;"><i>pini</i> (Kieffer, 1916, <i>Misocyclops</i>) </p><p style="margin-left: 40px;"><i>schlicki</i> Buhl, 1995 </p>							England, Scotland		added by Buhl (1995b)
83124	Animalia		Arthropoda			Insecta			Hymenoptera			PLATYGASTROIDEA	Platygastridae	Platygastrinae			Platygaster	Platygaster	confinis				Thomson, 1859								Ireland		added by Buhl &amp; O'Connor (2009)
83125	Animalia		Arthropoda			Insecta			Hymenoptera			PLATYGASTROIDEA	Platygastridae	Platygastrinae			Platygaster	Platygaster	consobrina				Kieffer, 1913								Scotland
83126	Animalia		Arthropoda			Insecta			Hymenoptera			PLATYGASTROIDEA	Platygastridae	Platygastrinae			Platygaster	Platygaster	contorticornis				Ratzeburg, 1844								England, Ireland
83127	Animalia		Arthropoda			Insecta			Hymenoptera			PLATYGASTROIDEA	Platygastridae	Platygastrinae			Platygaster	Platygaster	convergens				Kieffer, 1913								Scotland
83128	Animalia		Arthropoda			Insecta			Hymenoptera			PLATYGASTROIDEA	Platygastridae	Platygastrinae			Platygaster	Platygaster	cottei				Kieffer, 1913								Ireland		added by O'Connor et al. (2004)
83129	Animalia		Arthropoda			Insecta			Hymenoptera			PLATYGASTROIDEA	Platygastridae	Platygastrinae			Platygaster	Platygaster	cyrsilus				Walker, 1835								England, Wales, Ireland
83130	Animalia		Arthropoda			Insecta			Hymenoptera			PLATYGASTROIDEA	Platygastridae	Platygastrinae			Platygaster	Platygaster	damokles				Buhl, 1998								England		added by Buhl &amp; Notton (2009)
83131	Animalia		Arthropoda			Insecta			Hymenoptera			PLATYGASTROIDEA	Platygastridae	Platygastrinae			Platygaster	Platygaster	danica				Buhl, 1999								Ireland		added by Buhl &amp; O'Connor (2008)
83132	Animalia		Arthropoda			Insecta			Hymenoptera			PLATYGASTROIDEA	Platygastridae	Platygastrinae			Platygaster	Platygaster	deipyla				Walker, 1835								England
83133	Animalia		Arthropoda			Insecta			Hymenoptera			PLATYGASTROIDEA	Platygastridae	Platygastrinae			Platygaster	Platygaster	demades				Walker, 1835								England, Ireland, Isle of Man
83134	Animalia		Arthropoda			Insecta			Hymenoptera			PLATYGASTROIDEA	Platygastridae	Platygastrinae			Platygaster	Platygaster	dictys				Walker, 1835								England
83135	Animalia		Arthropoda			Insecta			Hymenoptera			PLATYGASTROIDEA	Platygastridae	Platygastrinae			Platygaster	Platygaster	dryope				Walker, 1835								Ireland, Isle of Man
83136	Animalia		Arthropoda			Insecta			Hymenoptera			PLATYGASTROIDEA	Platygastridae	Platygastrinae			Platygaster	Platygaster	elongata				Haliday, 1833	<p style="margin-left: 40px;"><i>attenuata</i> Walker, 1835 </p><p style="margin-left: 40px;"><i>evadne</i> Walker, 1835 </p>							England, Wales, Ireland
83137	Animalia		Arthropoda			Insecta			Hymenoptera			PLATYGASTROIDEA	Platygastridae	Platygastrinae			Platygaster	Platygaster	enneatoma				(Kieffer, 1913)	<p style="margin-left: 40px;"><i>Epimeces enneatomus </i>Kieffer, 1913</p>							Scotland
83138	Animalia		Arthropoda			Insecta			Hymenoptera			PLATYGASTROIDEA	Platygastridae	Platygastrinae			Platygaster	Platygaster	ennius				Walker, 1835								England, Scotland, Ireland
83139	Animalia		Arthropoda			Insecta			Hymenoptera			PLATYGASTROIDEA	Platygastridae	Platygastrinae			Platygaster	Platygaster	ensifer				(Westwood, 1833)	<p style="margin-left: 40px;"><i>Epimeces ensifer </i>Westwood, 1833</p>							England, Ireland
83140	Animalia		Arthropoda			Insecta			Hymenoptera			PLATYGASTROIDEA	Platygastridae	Platygastrinae			Platygaster	Platygaster	entwistlei				Buhl, 1997								England, Scotland		added by Buhl (1997)
83141	Animalia		Arthropoda			Insecta			Hymenoptera			PLATYGASTROIDEA	Platygastridae	Platygastrinae			Platygaster	Platygaster	equestris				Spittler, 1969								England		added by Buhl &amp; Notton (2009)
83142	Animalia		Arthropoda			Insecta			Hymenoptera			PLATYGASTROIDEA	Platygastridae	Platygastrinae			Platygaster	Platygaster	eriphyle				Walker, 1835								England, Ireland
83143	Animalia		Arthropoda			Insecta			Hymenoptera			PLATYGASTROIDEA	Platygastridae	Platygastrinae			Platygaster	Platygaster	euhemerus				Walker, 1835								England, Ireland, Isle of Man
83144	Animalia		Arthropoda			Insecta			Hymenoptera			PLATYGASTROIDEA	Platygastridae	Platygastrinae			Platygaster	Platygaster	floricola				(Kieffer, 1916)	<p style="margin-left: 40px;"><i>Prosactogaster floricola </i>Kieffer, 1916</p>							England, Ireland		added by Buhl &amp; Notton (2009)
83145	Animalia		Arthropoda			Insecta			Hymenoptera			PLATYGASTROIDEA	Platygastridae	Platygastrinae			Platygaster	Platygaster	frater				Buhl, 2006								England, Ireland		added by Buhl &amp; O'Connor (2009)
83146	Animalia		Arthropoda			Insecta			Hymenoptera			PLATYGASTROIDEA	Platygastridae	Platygastrinae			Platygaster	Platygaster	galenus				Walker, 1835								England, Ireland
83147	Animalia		Arthropoda			Insecta			Hymenoptera			PLATYGASTROIDEA	Platygastridae	Platygastrinae			Platygaster	Platygaster	germanica				Buhl, 1998								England		added by Buhl &amp; Notton (2009)
83148	Animalia		Arthropoda			Insecta			Hymenoptera			PLATYGASTROIDEA	Platygastridae	Platygastrinae			Platygaster	Platygaster	gladiator				Zetterstedt, 1838	<p style="margin-left: 40px;"><i>nitida</i> Thomson, 1859 </p>							England		added by Buhl &amp; Notton (2009)
83149	Animalia		Arthropoda			Insecta			Hymenoptera			PLATYGASTROIDEA	Platygastridae	Platygastrinae			Platygaster	Platygaster	gorge				Walker, 1835								England
83150	Animalia		Arthropoda			Insecta			Hymenoptera			PLATYGASTROIDEA	Platygastridae	Platygastrinae			Platygaster	Platygaster	gracilipes				Huggert, 1975								England, Scotland, Ireland, Isle of Man		added by Buhl (1995b)
83151	Animalia		Arthropoda			Insecta			Hymenoptera			PLATYGASTROIDEA	Platygastridae	Platygastrinae			Platygaster	Platygaster	gyge				Walker, 1835	<p style="margin-left: 40px;"><i>longiventris</i> Thomson, 1859 </p>							England, Scotland, Ireland
83152	Animalia		Arthropoda			Insecta			Hymenoptera			PLATYGASTROIDEA	Platygastridae	Platygastrinae			Platygaster	Platygaster	henkvlugi				Buhl, 1996								England, Scotland, Ireland		added by Buhl &amp; O'Connor (2008)
83153	Animalia		Arthropoda			Insecta			Hymenoptera			PLATYGASTROIDEA	Platygastridae	Platygastrinae			Platygaster	Platygaster	herricki				Packard, 1841								England
83154	Animalia		Arthropoda			Insecta			Hymenoptera			PLATYGASTROIDEA	Platygastridae	Platygastrinae			Platygaster	Platygaster	hibernica				Buhl &amp; O'Connor, 2009								Ireland		added by Buhl &amp; O'Connor (2009)
83155	Animalia		Arthropoda			Insecta			Hymenoptera			PLATYGASTROIDEA	Platygastridae	Platygastrinae			Platygaster	Platygaster	hiemalis				Forbes, 1888								England		added by Gahan (1933). Omitted by Fergusson (1978).
83156	Animalia		Arthropoda			Insecta			Hymenoptera			PLATYGASTROIDEA	Platygastridae	Platygastrinae			Platygaster	Platygaster	hybrida				Buhl, 1994								England, Scotland		added by Buhl &amp; Notton (2009)
83157	Animalia		Arthropoda			Insecta			Hymenoptera			PLATYGASTROIDEA	Platygastridae	Platygastrinae			Platygaster	Platygaster	hyemalis				Curtis, 1830
83158	Animalia		Arthropoda			Insecta			Hymenoptera			PLATYGASTROIDEA	Platygastridae	Platygastrinae			Platygaster	Platygaster	inermis				Walker, 1835								Ireland		added by Buhl &amp; O'Connor (2008)
83159	Animalia		Arthropoda			Insecta			Hymenoptera			PLATYGASTROIDEA	Platygastridae	Platygastrinae			Platygaster	Platygaster	intermediana				Buhl, 2009	<p style="margin-left: 40px;"><i>intermedia</i> Buhl, 2006 preocc.</p>							England, Ireland		added by Buhl &amp; O'Connor (2008)
83160	Animalia		Arthropoda			Insecta			Hymenoptera			PLATYGASTROIDEA	Platygastridae	Platygastrinae			Platygaster	Platygaster	iolas				Walker, 1835								England
83161	Animalia		Arthropoda			Insecta			Hymenoptera			PLATYGASTROIDEA	Platygastridae	Platygastrinae			Platygaster	Platygaster	jutlandica				Buhl, 2006								England		added by Buhl &amp; Notton (2009)
83162	Animalia		Arthropoda			Insecta			Hymenoptera			PLATYGASTROIDEA	Platygastridae	Platygastrinae			Platygaster	Platygaster	krarupi				Buhl, 1995								England		added by Buhl &amp; Notton (2009)
83163	Animalia		Arthropoda			Insecta			Hymenoptera			PLATYGASTROIDEA	Platygastridae	Platygastrinae			Platygaster	Platygaster	leptines				Walker, 1835								England, Ireland, Isle of Man
83164	Animalia		Arthropoda			Insecta			Hymenoptera			PLATYGASTROIDEA	Platygastridae	Platygastrinae			Platygaster	Platygaster	?leucanthemi				(Kieffer, 1916)	<p style="margin-left: 40px;"><i>Misocyclops leucanthemi </i>Kieffer, 1916</p>							Wales		recorded by Buhl &amp; Notton (2009)
83165	Animalia		Arthropoda			Insecta			Hymenoptera			PLATYGASTROIDEA	Platygastridae	Platygastrinae			Platygaster	Platygaster	?lineata				Kieffer, 1906								England		recorded by Barnes (1948)
83166	Animalia		Arthropoda			Insecta			Hymenoptera			PLATYGASTROIDEA	Platygastridae	Platygastrinae			Platygaster	Platygaster	lineaticeps				Buhl, 1994								Scotland, Ireland		added by Buhl &amp; Notton (2009)
83167	Animalia		Arthropoda			Insecta			Hymenoptera			PLATYGASTROIDEA	Platygastridae	Platygastrinae			Platygaster	Platygaster	longestriolata				Thomson, 1859								England, Ireland, Isle of Man		added by Buhl &amp; O'Connor (2008)
83168	Animalia		Arthropoda			Insecta			Hymenoptera			PLATYGASTROIDEA	Platygastridae	Platygastrinae			Platygaster	Platygaster	longicaudata				Kieffer, 1906								England		added by Barnes (1927). Omitted by Fergusson (1978).
83169	Animalia		Arthropoda			Insecta			Hymenoptera			PLATYGASTROIDEA	Platygastridae	Platygastrinae			Platygaster	Platygaster	lysicles				Walker, 1835	<p style="margin-left: 40px;"><i>lativentris</i> Thomson, 1859 </p>							England, Scotland, Ireland, Isle of Man
83170	Animalia		Arthropoda			Insecta			Hymenoptera			PLATYGASTROIDEA	Platygastridae	Platygastrinae			Platygaster	Platygaster	malpighii				Kieffer, 1916	<p style="margin-left: 40px;"><i>hanseni</i> Buhl, 2006 </p>							England, Ireland		added by Buhl &amp; O'Connor (2008)
83171	Animalia		Arthropoda			Insecta			Hymenoptera			PLATYGASTROIDEA	Platygastridae	Platygastrinae			Platygaster	Platygaster	manensis				Buhl &amp; Bennett, 2009								Isle of Man		added by Buhl &amp; Bennett (2009)
83172	Animalia		Arthropoda			Insecta			Hymenoptera			PLATYGASTROIDEA	Platygastridae	Platygastrinae			Platygaster	Platygaster	manto				Walker, 1835								England, Scotland, Ireland, Isle of Man
83173	Animalia		Arthropoda			Insecta			Hymenoptera			PLATYGASTROIDEA	Platygastridae	Platygastrinae			Platygaster	Platygaster	marchali				Kieffer, 1906								England		added by Barnes (1931). Omitted by Fergusson (1978).
83174	Animalia		Arthropoda			Insecta			Hymenoptera			PLATYGASTROIDEA	Platygastridae	Platygastrinae			Platygaster	Platygaster	marginata				Thomson, 1859	<p style="margin-left: 40px;"><i>occipitalis</i> Buhl, 1994 </p>							England, Ireland		added by Buhl (1995b)
83175	Animalia		Arthropoda			Insecta			Hymenoptera			PLATYGASTROIDEA	Platygastridae	Platygastrinae			Platygaster	Platygaster	marshalli				(Kieffer, 1916)	<p style="margin-left: 40px;"><i>Prosactogaster marshalli </i>Kieffer, 1916</p>							England
83176	Animalia		Arthropoda			Insecta			Hymenoptera			PLATYGASTROIDEA	Platygastridae	Platygastrinae			Platygaster	Platygaster	martikaineni				Buhl, 2003								England, Scotland		added by Buhl &amp; Notton (2009)
83177	Animalia		Arthropoda			Insecta			Hymenoptera			PLATYGASTROIDEA	Platygastridae	Platygastrinae			Platygaster	Platygaster	masneri				Huggert, 1975								England, Ireland		added by Buhl &amp; O'Connor (2008)
83178	Animalia		Arthropoda			Insecta			Hymenoptera			PLATYGASTROIDEA	Platygastridae	Platygastrinae			Platygaster	Platygaster	mayetiolae				Kieffer, 1916								England
83179	Animalia		Arthropoda			Insecta			Hymenoptera			PLATYGASTROIDEA	Platygastridae	Platygastrinae			Platygaster	Platygaster	microsculpturata				Buhl, 1999								England		added by Buhl &amp; Notton (2009)
83180	Animalia		Arthropoda			Insecta			Hymenoptera			PLATYGASTROIDEA	Platygastridae	Platygastrinae			Platygaster	Platygaster	minthe				Walker, 1835	<p style="margin-left: 40px;"><i>laeviventris</i> Thomson, 1859 </p>							England
83181	Animalia		Arthropoda			Insecta			Hymenoptera			PLATYGASTROIDEA	Platygastridae	Platygastrinae			Platygaster	Platygaster	minutula				Dalla Torre, 1898								England		added by Barnes (1956). Omitted by Fergusson (1978).
83182	Animalia		Arthropoda			Insecta			Hymenoptera			PLATYGASTROIDEA	Platygastridae	Platygastrinae			Platygaster	Platygaster	misella				Buhl, 2006								England, Scotland		added by Buhl &amp; Notton (2009). Tentative identification (based on Scottish material) by Buhl &amp; Notton (2009) but recorded, from reared English specimens, without any question marks by Buhl (2009b).
83183	Animalia		Arthropoda			Insecta			Hymenoptera			PLATYGASTROIDEA	Platygastridae	Platygastrinae			Platygaster	Platygaster	molsensis				Buhl, 1995								England, Scotland, Wales		added by Buhl &amp; Notton (2009)
83184	Animalia		Arthropoda			Insecta			Hymenoptera			PLATYGASTROIDEA	Platygastridae	Platygastrinae			Platygaster	Platygaster	munita				Walker, 1835								England, Wales, Ireland
83185	Animalia		Arthropoda			Insecta			Hymenoptera			PLATYGASTROIDEA	Platygastridae	Platygastrinae			Platygaster	Platygaster	nashi				Buhl &amp; O’Connor, 2011								Ireland		added Buhl &amp; O’Connor (2011a)
83186	Animalia		Arthropoda			Insecta			Hymenoptera			PLATYGASTROIDEA	Platygastridae	Platygastrinae			Platygaster	Platygaster	nigra				Nees, 1834	<p style="margin-left: 40px;"><i>nigerrimus</i> (Kieffer, 1926, <i>Misocyclops</i>) </p>							Ireland
83187	Animalia		Arthropoda			Insecta			Hymenoptera			PLATYGASTROIDEA	Platygastridae	Platygastrinae			Platygaster	Platygaster	nisus				Walker, 1835								England, Scotland, Wales, Ireland, Isle of Man
83188	Animalia		Arthropoda			Insecta			Hymenoptera			PLATYGASTROIDEA	Platygastridae	Platygastrinae			Platygaster	Platygaster	nixoni				Buhl, 2009								England		added by Buhl (2009a)
83189	Animalia		Arthropoda			Insecta			Hymenoptera			PLATYGASTROIDEA	Platygastridae	Platygastrinae			Platygaster	Platygaster	oebalus				Walker, 1835								England, Ireland, Isle of Man
83190	Animalia		Arthropoda			Insecta			Hymenoptera			PLATYGASTROIDEA	Platygastridae	Platygastrinae			Platygaster	Platygaster	oeclus				Walker, 1835								England, Scotland, Ireland
83191	Animalia		Arthropoda			Insecta			Hymenoptera			PLATYGASTROIDEA	Platygastridae	Platygastrinae			Platygaster	Platygaster	orcus				Walker, 1835								England, Ireland
83192	Animalia		Arthropoda			Insecta			Hymenoptera			PLATYGASTROIDEA	Platygastridae	Platygastrinae			Platygaster	Platygaster	orus				Walker, 1835								England, Ireland
83193	Animalia		Arthropoda			Insecta			Hymenoptera			PLATYGASTROIDEA	Platygastridae	Platygastrinae			Platygaster	Platygaster	oscus				Walker, 1835								England, Scotland, Ireland, Isle of Man
83194	Animalia		Arthropoda			Insecta			Hymenoptera			PLATYGASTROIDEA	Platygastridae	Platygastrinae			Platygaster	Platygaster	otanes				Walker, 1835	<p style="margin-left: 40px;"><i>fuscipes</i> Thomson, 1859 </p>							England, Ireland, Isle of Man
83195	Animalia		Arthropoda			Insecta			Hymenoptera			PLATYGASTROIDEA	Platygastridae	Platygastrinae			Platygaster	Platygaster	pedasus				Walker, 1835								England, Scotland, Ireland
83196	Animalia		Arthropoda			Insecta			Hymenoptera			PLATYGASTROIDEA	Platygastridae	Platygastrinae			Platygaster	Platygaster	pelias				Walker, 1835	<p style="margin-left: 40px;"><i>apicalis</i> Thomson, 1859 </p><p style="margin-left: 40px;"><i>ruborum</i> (Kieffer, 1916, <i></i>) </p><p style="margin-left: 40px;"><i>crevecoeuri</i> (Maneval, 1936, <i>Misocyclops</i>) </p>							England, Ireland, Isle of Man		Tentatively identified individuals recorded from Wales too (Buhl &amp; Notton, 2009).
83197	Animalia		Arthropoda			Insecta			Hymenoptera			PLATYGASTROIDEA	Platygastridae	Platygastrinae			Platygaster	Platygaster	philinna				Walker, 1835	<p style="margin-left: 40px;"><i>nottoni</i> Buhl, 1995 </p>							England, Scotland, Wales, Ireland
83198	Animalia		Arthropoda			Insecta			Hymenoptera			PLATYGASTROIDEA	Platygastridae	Platygastrinae			Platygaster	Platygaster	phragmitis				(Schrank, 1781)	<p style="margin-left: 40px;"><i>Cynips phragmitis </i>Schrank, 1781</p>
83199	Animalia		Arthropoda			Insecta			Hymenoptera			PLATYGASTROIDEA	Platygastridae	Platygastrinae			Platygaster	Platygaster	picipes				Förster, 1861								England		added by Buhl &amp; Notton (2009)
83200	Animalia		Arthropoda			Insecta			Hymenoptera			PLATYGASTROIDEA	Platygastridae	Platygastrinae			Platygaster	Platygaster	pleuron				Walker, 1835								England
83201	Animalia		Arthropoda			Insecta			Hymenoptera			PLATYGASTROIDEA	Platygastridae	Platygastrinae			Platygaster	Platygaster	plotina				Walker, 1835								England
83202	Animalia		Arthropoda			Insecta			Hymenoptera			PLATYGASTROIDEA	Platygastridae	Platygastrinae			Platygaster	Platygaster	polita				Thomson, 1859								Wales		added by Buhl &amp; Notton (2009)
83203	Animalia		Arthropoda			Insecta			Hymenoptera			PLATYGASTROIDEA	Platygastridae	Platygastrinae			Platygaster	Platygaster	puccinii				Vlug, 1995	<p style="margin-left: 40px;"><i>nigripes</i> Thomson, 1859 preocc.</p><p style="margin-left: 40px;"><i>thomsoni</i> Buhl, 1995 </p>							England, Wales, Ireland		added by Buhl &amp; O'Connor (2008)
83204	Animalia		Arthropoda			Insecta			Hymenoptera			PLATYGASTROIDEA	Platygastridae	Platygastrinae			Platygaster	Platygaster	quadriceps				Buhl, 2006								Ireland		added by Buhl &amp; O’Connor (2010b)
83205	Animalia		Arthropoda			Insecta			Hymenoptera			PLATYGASTROIDEA	Platygastridae	Platygastrinae			Platygaster	Platygaster	quadrifaria				(Kieffer, 1916)	<p style="margin-left: 40px;"><i>Polygnotus quadrifaria </i>Kieffer, 1916</p>							England
83206	Animalia		Arthropoda			Insecta			Hymenoptera			PLATYGASTROIDEA	Platygastridae	Platygastrinae			Platygaster	Platygaster	rutilipes				Buhl, 1997								England		added by Buhl &amp; Notton (2009)
83207	Animalia		Arthropoda			Insecta			Hymenoptera			PLATYGASTROIDEA	Platygastridae	Platygastrinae			Platygaster	Platygaster	rutubus				Walker, 1835	<p style="margin-left: 40px;"><i>luteocoxalis</i> (Kozlov, 1966, <i>Prosactogaster</i>) </p>							England
83208	Animalia		Arthropoda			Insecta			Hymenoptera			PLATYGASTROIDEA	Platygastridae	Platygastrinae			Platygaster	Platygaster	sagana				Walker, 1835								England, Scotland, Wales, Ireland, Isle of Man
83209	Animalia		Arthropoda			Insecta			Hymenoptera			PLATYGASTROIDEA	Platygastridae	Platygastrinae			Platygaster	Platygaster	scotica				Kieffer, 1913								Scotland
83210	Animalia		Arthropoda			Insecta			Hymenoptera			PLATYGASTROIDEA	Platygastridae	Platygastrinae			Platygaster	Platygaster	signata				(Förster, 1861)	<p style="margin-left: 40px;"><i>Polygnotus signatus </i>Förster, 1861</p>							Scotland, Ireland		added by Buhl &amp; O'Connor (2009)
83211	Animalia		Arthropoda			Insecta			Hymenoptera			PLATYGASTROIDEA	Platygastridae	Platygastrinae			Platygaster	Platygaster	singularis				Buhl, 2006								Ireland		added by Buhl &amp; O'Connor (2009)
83212	Animalia		Arthropoda			Insecta			Hymenoptera			PLATYGASTROIDEA	Platygastridae	Platygastrinae			Platygaster	Platygaster	soederlundi				Buhl, 1998								England		added by Buhl &amp; Notton (2009)
83213	Animalia		Arthropoda			Insecta			Hymenoptera			PLATYGASTROIDEA	Platygastridae	Platygastrinae			Platygaster	Platygaster	sonchis				Walker, 1835								England
83214	Animalia		Arthropoda			Insecta			Hymenoptera			PLATYGASTROIDEA	Platygastridae	Platygastrinae			Platygaster	Platygaster	splendidula				Ruthe, 1859	<p style="margin-left: 40px;"><i>leptocera</i> Thomson, 1859 </p><p style="margin-left: 40px;"><i>hirticornis</i> Förster, 1861 </p><p style="margin-left: 40px;"><i>lissonota</i> Förster, 1861 </p>							England, Ireland, Isle of Man		added by Buhl &amp; O'Connor (2008)
83215	Animalia		Arthropoda			Insecta			Hymenoptera			PLATYGASTROIDEA	Platygastridae	Platygastrinae			Platygaster	Platygaster	sterope				Walker, 1835								England, Isle of Man
83216	Animalia		Arthropoda			Insecta			Hymenoptera			PLATYGASTROIDEA	Platygastridae	Platygastrinae			Platygaster	Platygaster	strato				Walker, 1835								Scotland
83217	Animalia		Arthropoda			Insecta			Hymenoptera			PLATYGASTROIDEA	Platygastridae	Platygastrinae			Platygaster	Platygaster	striatithorax				Buhl, 1994								England, Wales		added by Buhl &amp; Notton (2009)
83218	Animalia		Arthropoda			Insecta			Hymenoptera			PLATYGASTROIDEA	Platygastridae	Platygastrinae			Platygaster	Platygaster	subapicalis				Buhl, 2006								Ireland, Isle of Man		added by Buhl &amp; Bennett (2009), Buhl &amp; O'Connor (2009)
83219	Animalia		Arthropoda			Insecta			Hymenoptera			PLATYGASTROIDEA	Platygastridae	Platygastrinae			Platygaster	Platygaster	sublongicornis				Buhl, 2009								Scotland		added by Buhl (2009a)
83220	Animalia		Arthropoda			Insecta			Hymenoptera			PLATYGASTROIDEA	Platygastridae	Platygastrinae			Platygaster	Platygaster	subuliformis				(Kieffer, 1926)	<p style="margin-left: 40px;"><i>Prosactogaster subuliformis </i>Kieffer, 1926</p><p style="margin-left: 40px;"><i>Platygaster</i> </p><p style="margin-left: 40px;"><i>subulatus</i> misident. </p>							England, Ireland
83221	Animalia		Arthropoda			Insecta			Hymenoptera			PLATYGASTROIDEA	Platygastridae	Platygastrinae			Platygaster	Platygaster	suecica				(Kieffer, 1926)	<p style="margin-left: 40px;"><i>MISSING Polygnotus suecicus </i>Kieffer, 1926</p>							Ireland		added by Buhl &amp; O'Connor (2008)
83222	Animalia		Arthropoda			Insecta			Hymenoptera			PLATYGASTROIDEA	Platygastridae	Platygastrinae			Platygaster	Platygaster	szelenyii				Huggert, 1975	<p style="margin-left: 40px;"><i>crassus</i> Szélenyi, 1958 preocc.</p>							England, Wales		added by Buhl &amp; Notton (2009)
83223	Animalia		Arthropoda			Insecta			Hymenoptera			PLATYGASTROIDEA	Platygastridae	Platygastrinae			Platygaster	Platygaster	taras				Walker, 1835								England, Wales
83224	Animalia		Arthropoda			Insecta			Hymenoptera			PLATYGASTROIDEA	Platygastridae	Platygastrinae			Platygaster	Platygaster	tisias				Walker, 1835	<p style="margin-left: 40px;"><i>siphon</i> Förster, 1840 </p>							England, Scotland, Wales, Ireland, Isle of Man
83225	Animalia		Arthropoda			Insecta			Hymenoptera			PLATYGASTROIDEA	Platygastridae	Platygastrinae			Platygaster	Platygaster	tuberata				Kieffer, 1926	<p style="margin-left: 40px;"><i>tuberosa</i> Kieffer, 1913 preocc.</p>							Scotland
83226	Animalia		Arthropoda			Insecta			Hymenoptera			PLATYGASTROIDEA	Platygastridae	Platygastrinae			Platygaster	Platygaster	tuberosula				Kieffer, 1926								England		added by Buhl &amp; Notton (2009)
83227	Animalia		Arthropoda			Insecta			Hymenoptera			PLATYGASTROIDEA	Platygastridae	Platygastrinae			Platygaster	Platygaster	uniformis				Buhl, 2006								England, Ireland		added by Buhl &amp; Notton (2009)
83228	Animalia		Arthropoda			Insecta			Hymenoptera			PLATYGASTROIDEA	Platygastridae	Platygastrinae			Platygaster	Platygaster	vaenia				Walker, 1835	<p style="margin-left: 40px;"><i>ilione</i> Walker, 1835 </p>							England
83229	Animalia		Arthropoda			Insecta			Hymenoptera			PLATYGASTROIDEA	Platygastridae	Platygastrinae			Platygaster	Platygaster	virgo				Day, 1971								England, Wales, Ireland
83230	Animalia		Arthropoda			Insecta			Hymenoptera			PLATYGASTROIDEA	Platygastridae	Platygastrinae			Platygaster	Platygaster	vulgaris				Buhl, 1998								England		added by Buhl &amp; Notton (2009)
83231	Animalia		Arthropoda			Insecta			Hymenoptera			PLATYGASTROIDEA	Platygastridae	Platygastrinae			Platygaster	Platygaster	xeneus				Walker, 1838								Ireland
83232	Animalia		Arthropoda			Insecta			Hymenoptera			PLATYGASTROIDEA	Platygastridae	Platygastrinae			Platygaster	Platygaster	zosine				Walker, 1835								England
83233	Animalia		Arthropoda			Insecta			Hymenoptera			PLATYGASTROIDEA	Platygastridae	Platygastrinae			Platygaster	Urocyclops					Maneval, 1936
83234	Animalia		Arthropoda			Insecta			Hymenoptera			PLATYGASTROIDEA	Platygastridae	Platygastrinae			Platygaster	Urocyclops	depressiventris				Thomson, 1859	<p style="margin-left: 40px;"><i>bettyae</i> (Maneval, 1936, <i>Paracyclops</i>) </p><p style="margin-left: 40px;"><i>roosevelti</i> (Debauche, 1947, <i>Urocyclops</i>) </p><p style="margin-left: 40px;"><i>humbolti</i> (Fabritius &amp; Grelimann, 1972, <i>Urocyclops</i>) </p>							England, Scotland, Wales
83235	Animalia		Arthropoda			Insecta			Hymenoptera			PLATYGASTROIDEA	Platygastridae	Platygastrinae			Synopeas						Förster, 1856	<p style="margin-left: 40px;"><i>POLYMECUS</i> Förster, 1856</p><p style="margin-left: 40px;"><i>DOLICHOTRYPES</i> Crawford &amp; Bradley, 1911</p>
83236	Animalia		Arthropoda			Insecta			Hymenoptera			PLATYGASTROIDEA	Platygastridae	Platygastrinae			Synopeas		aceris				Buhl &amp; Bennett, 2009								Isle of Man		added by Buhl &amp; Bennett (2009)
83237	Animalia		Arthropoda			Insecta			Hymenoptera			PLATYGASTROIDEA	Platygastridae	Platygastrinae			Synopeas		bohemani				Buhl, 1998								England		added by Buhl &amp; Notton (2009)
83238	Animalia		Arthropoda			Insecta			Hymenoptera			PLATYGASTROIDEA	Platygastridae	Platygastrinae			Synopeas		breve				Buhl, 1998								Ireland, Isle of Man		NHM, det. PB.; added by O'Connor et al. (2004)
83239	Animalia		Arthropoda			Insecta			Hymenoptera			PLATYGASTROIDEA	Platygastridae	Platygastrinae			Synopeas		chica				Buhl, 2004								England, Ireland		added by Buhl &amp; Notton (2009)
83240	Animalia		Arthropoda			Insecta			Hymenoptera			PLATYGASTROIDEA	Platygastridae	Platygastrinae			Synopeas		ciliatum				Thomson, 1859								England, Ireland, Isle of Man
83241	Animalia		Arthropoda			Insecta			Hymenoptera			PLATYGASTROIDEA	Platygastridae	Platygastrinae			Synopeas		convexum				Thomson, 1859								Ireland		added by Buhl &amp; O’Connor (2010b). Listed as Synopeas cf. convexum, occurring in England and Ireland, by Buhl &amp; Notton (2009), then as a certain identification of Irish specimens by Buhl &amp; O’Connor (2010b).
83242	Animalia		Arthropoda			Insecta			Hymenoptera			PLATYGASTROIDEA	Platygastridae	Platygastrinae			Synopeas		craterus				(Walker, 1835)	<p style="margin-left: 40px;"><i>Platygaster craterus </i>Walker, 1835</p><p style="margin-left: 40px;"><i>gynomamertes</i> (Hincks, 1944, <i>Ectadius</i>) invalid</p>							England, Ireland
83243	Animalia		Arthropoda			Insecta			Hymenoptera			PLATYGASTROIDEA	Platygastridae	Platygastrinae			Synopeas		curvicauda				(Förster, 1856)	<p style="margin-left: 40px;"><i>Sactogaster curvicauda </i>Förster, 1856</p><p style="margin-left: 40px;"><i>Synopeas</i> </p><p style="margin-left: 40px;"><i>longicauda</i> (Förster, 1856, <i>Sactogaster</i>) </p><p style="margin-left: 40px;"><i>pisi</i> (Förster, 1856, <i>Sactogaster</i>) </p>							England, Ireland, Isle of Man
83244	Animalia		Arthropoda			Insecta			Hymenoptera			PLATYGASTROIDEA	Platygastridae	Platygastrinae			Synopeas		erinum				Buhl &amp; O’Connor, 2010								Ireland		added by Buhl &amp; O’Connor (2011d)
83245	Animalia		Arthropoda			Insecta			Hymenoptera			PLATYGASTROIDEA	Platygastridae	Platygastrinae			Synopeas		euryale				(Walker, 1835)	<p style="margin-left: 40px;"><i>Platygaster euryale </i>Walker, 1835</p>							England, Ireland
83246	Animalia		Arthropoda			Insecta			Hymenoptera			PLATYGASTROIDEA	Platygastridae	Platygastrinae			Synopeas		fungorum				Buhl, 2000								England		added by Buhl &amp; Notton (2009)
83247	Animalia		Arthropoda			Insecta			Hymenoptera			PLATYGASTROIDEA	Platygastridae	Platygastrinae			Synopeas		fuscicola				Box, 1921								England, Wales
83248	Animalia		Arthropoda			Insecta			Hymenoptera			PLATYGASTROIDEA	Platygastridae	Platygastrinae			Synopeas		gallicola				Kieffer, 1916								England
83249	Animalia		Arthropoda			Insecta			Hymenoptera			PLATYGASTROIDEA	Platygastridae	Platygastrinae			Synopeas		gibberosum				Buhl, 1997								England, Ireland		added by Buhl &amp; O'Connor (2008)
83250	Animalia		Arthropoda			Insecta			Hymenoptera			PLATYGASTROIDEA	Platygastridae	Platygastrinae			Synopeas		hibernicum				Buhl &amp; O'Connor, 2009								Ireland		added by Buhl &amp; O'Connor (2009)
83251	Animalia		Arthropoda			Insecta			Hymenoptera			PLATYGASTROIDEA	Platygastridae	Platygastrinae			Synopeas		hyllus				(Walker, 1835)	<p style="margin-left: 40px;"><i>Platygaster hyllus </i>Walker, 1835</p><p style="margin-left: 40px;"><i>figitiforme</i> Thomson, 1859 </p>							England, Scotland, Wales, Ireland
83252	Animalia		Arthropoda			Insecta			Hymenoptera			PLATYGASTROIDEA	Platygastridae	Platygastrinae			Synopeas		inerme				Thomson, 1859								England, Ireland
83253	Animalia		Arthropoda			Insecta			Hymenoptera			PLATYGASTROIDEA	Platygastridae	Platygastrinae			Synopeas		jasius				(Walker, 1835)	<p style="margin-left: 40px;"><i>Platygaster jasius </i>Walker, 1835</p>							England, Ireland
83254	Animalia		Arthropoda			Insecta			Hymenoptera			PLATYGASTROIDEA	Platygastridae	Platygastrinae			Synopeas		larides				(Walker, 1835)	<p style="margin-left: 40px;"><i>Platygaster larides </i>Walker, 1835</p>							England, Ireland
83255	Animalia		Arthropoda			Insecta			Hymenoptera			PLATYGASTROIDEA	Platygastridae	Platygastrinae			Synopeas		latvianum				Buhl, 2009								England, Isle of Man		added by Buhl &amp; Bennett (2009)
83256	Animalia		Arthropoda			Insecta			Hymenoptera			PLATYGASTROIDEA	Platygastridae	Platygastrinae			Synopeas		londiniense				Buhl, 2009								England		added by Buhl (2009a)
83257	Animalia		Arthropoda			Insecta			Hymenoptera			PLATYGASTROIDEA	Platygastridae	Platygastrinae			Synopeas		lugubre				Thomson, 1859								England, Ireland		added by Notton (2008)
83258	Animalia		Arthropoda			Insecta			Hymenoptera			PLATYGASTROIDEA	Platygastridae	Platygastrinae			Synopeas		manense				Buhl &amp; Bennett, 2009								Isle of Man		added by Buhl &amp; Bennett (2009)
83259	Animalia		Arthropoda			Insecta			Hymenoptera			PLATYGASTROIDEA	Platygastridae	Platygastrinae			Synopeas		myles				(Walker, 1835)	<p style="margin-left: 40px;"><i>Platygaster myles </i>Walker, 1835</p>							England, Scotland, Ireland, Isle of Man
83260	Animalia		Arthropoda			Insecta			Hymenoptera			PLATYGASTROIDEA	Platygastridae	Platygastrinae			Synopeas		nottoni				Buhl, 2009								England		added by Buhl (2009a)
83261	Animalia		Arthropoda			Insecta			Hymenoptera			PLATYGASTROIDEA	Platygastridae	Platygastrinae			Synopeas		noyesi				Buhl, 2009								England, Ireland		added by Buhl (2009a)
83262	Animalia		Arthropoda			Insecta			Hymenoptera			PLATYGASTROIDEA	Platygastridae	Platygastrinae			Synopeas		opacum				Thomson, 1859								England, Ireland		added by Buhl &amp; O'Connor (2009)
83263	Animalia		Arthropoda			Insecta			Hymenoptera			PLATYGASTROIDEA	Platygastridae	Platygastrinae			Synopeas		osaces				(Walker, 1835)	<p style="margin-left: 40px;"><i>Platygaster osaces </i>Walker, 1835</p>							England, Ireland
83264	Animalia		Arthropoda			Insecta			Hymenoptera			PLATYGASTROIDEA	Platygastridae	Platygastrinae			Synopeas		rhanis				(Walker, 1835)	<p style="margin-left: 40px;"><i>Platygaster rhanis </i>Walker, 1835</p><p style="margin-left: 40px;"><i>acco</i> (Walker, 1835, <i>Platygaster</i>) </p>							England, Ireland, Isle of Man
83265	Animalia		Arthropoda			Insecta			Hymenoptera			PLATYGASTROIDEA	Platygastridae	Platygastrinae			Synopeas		robustum				Buhl, 2004								England		added by Buhl &amp; Notton (2009)
83266	Animalia		Arthropoda			Insecta			Hymenoptera			PLATYGASTROIDEA	Platygastridae	Platygastrinae			Synopeas		romsoeense				Buhl, 1997								England, Isle of Man		added by Buhl &amp; Bennett (2009)
83267	Animalia		Arthropoda			Insecta			Hymenoptera			PLATYGASTROIDEA	Platygastridae	Platygastrinae			Synopeas		sosis				(Walker, 1835)	<p style="margin-left: 40px;"><i>Platygaster sosis </i>Walker, 1835</p><p style="margin-left: 40px;"><i>muticus</i> misident. </p>							England, Scotland, Ireland, Isle of Man		Synopeas muticus (Nees, 1834, Platygaster), as recorded by Buhl and O'Connor (2008) refers to sosis (Buhl and O'Connor 2010b).
83268	Animalia		Arthropoda			Insecta			Hymenoptera			PLATYGASTROIDEA	Platygastridae	Platygastrinae			Synopeas		tarsa				(Walker, 1835)	<p style="margin-left: 40px;"><i>Platygaster tarsa </i>Walker, 1835</p>							England, Ireland
83269	Animalia		Arthropoda			Insecta			Hymenoptera			PLATYGASTROIDEA	Platygastridae	Platygastrinae			Synopeas		trebius				(Walker, 1835)	<p style="margin-left: 40px;"><i>Platygaster trebius </i>Walker, 1835</p>							England, Ireland, Isle of Man
83270	Animalia		Arthropoda			Insecta			Hymenoptera			PLATYGASTROIDEA	Platygastridae	Platygastrinae			Synopeas		velutinum				(Walker, 1835)	<p style="margin-left: 40px;"><i>Platygaster velutinus </i>Walker, 1835</p>							England, Ireland		Described from English specimens, omitted by Fergusson (1978).
83271	Animalia		Arthropoda			Insecta			Hymenoptera			PLATYGASTROIDEA	Platygastridae	Platygastrinae			Synopeas		ventrale				(Westwood, 1833)	<p style="margin-left: 40px;"><i>Epimeces ventralis </i>Westwood, 1833</p><p style="margin-left: 40px;"><i>abaris</i> (Walker, 1835, <i>Platygaster</i>) </p>							England
83272	Animalia		Arthropoda			Insecta			Hymenoptera			PLATYGASTROIDEA	Platygastridae	Platygastrinae			Synopeas		xanthopus				Kieffer, 1913								Scotland
83273	Animalia		Arthropoda			Insecta			Hymenoptera			PLATYGASTROIDEA	Platygastridae	Platygastrinae			Trichacis						Förster, 1856
83274	Animalia		Arthropoda			Insecta			Hymenoptera			PLATYGASTROIDEA	Platygastridae	Platygastrinae			Trichacis		didas				(Walker, 1835)	<p style="margin-left: 40px;"><i>Platygaster didas </i>Walker, 1835</p>							England, Ireland, Isle of Man
83275	Animalia		Arthropoda			Insecta			Hymenoptera			PLATYGASTROIDEA	Platygastridae	Platygastrinae			Trichacis		pisis				(Walker, 1835)	<p style="margin-left: 40px;"><i>Platygaster pisis </i>Walker, 1835</p><p style="margin-left: 40px;"><i>opaca</i> Thomson, 1859 </p>							England, Ireland, Isle of Man
83276	Animalia		Arthropoda			Insecta			Hymenoptera			PLATYGASTROIDEA	Platygastridae	Platygastrinae			Trichacis		remulus				(Walker, 1835)	<p style="margin-left: 40px;"><i>Platygaster remulus </i>Walker, 1835</p>							England
83277	Animalia		Arthropoda			Insecta			Hymenoptera			PLATYGASTROIDEA	Platygastridae	Sceliotrachelinae
83278	Animalia		Arthropoda			Insecta			Hymenoptera			PLATYGASTROIDEA	Platygastridae	Sceliotrachelinae			Allotropa						Förster, 1856	<p style="margin-left: 40px;"><i>EUROSTEMMA</i> Szelényi, 1938</p><p style="margin-left: 40px;"><i>NASDIA</i> Nixon, 1942</p><p style="margin-left: 40px;"><i>PLATYTROPA</i> Kozlov, 1976</p>
83279	Animalia		Arthropoda			Insecta			Hymenoptera			PLATYGASTROIDEA	Platygastridae	Sceliotrachelinae			Allotropa		europus				(Walker, 1838)	<p style="margin-left: 40px;"><i>Inostemma europus </i>Walker, 1838</p>							Ireland
83280	Animalia		Arthropoda			Insecta			Hymenoptera			PLATYGASTROIDEA	Platygastridae	Sceliotrachelinae			Allotropa		mecrida				(Walker, 1836)	<p style="margin-left: 40px;"><i>Inostemma mecrida </i>Walker, 1836</p>							England, Ireland, Isle of Man
83281	Animalia		Arthropoda			Insecta			Hymenoptera			PLATYGASTROIDEA	Platygastridae	Sceliotrachelinae			Amitus						Haldeman, 1850	<p style="margin-left: 40px;"><i>ZACRITA</i> Förster, 1878</p><p style="margin-left: 40px;"><i>ELAPTUS</i> Forbes, 1884</p>
83282	Animalia		Arthropoda			Insecta			Hymenoptera			PLATYGASTROIDEA	Platygastridae	Sceliotrachelinae			Amitus		longicornis				(Förster, 1878)	<p style="margin-left: 40px;"><i>Zacrita longicornis </i>Förster, 1878</p>							England		added by Buhl &amp; Notton (2009)
83283	Animalia		Arthropoda			Insecta			Hymenoptera			PLATYGASTROIDEA	Platygastridae	Sceliotrachelinae			Amitus		sp.				indet.								England		Amitus minervae auctt., not A. minervae Silvestri. added by Polaszek (1997)
83284	Animalia		Arthropoda			Insecta			Hymenoptera			PLATYGASTROIDEA	Platygastridae	Sceliotrachelinae			Fidiobia						Ashmead, 1894	<p style="margin-left: 40px;"><i>ROSNETA</i> Brues, 1908</p><p style="margin-left: 40px;"><i>TRICLAVUS</i> Brèthes, 1916</p><p style="margin-left: 40px;"><i>FAHRINGERIA</i> Kieffer, 1921</p><p style="margin-left: 40px;"><i>PLATYLLOTROPA</i> Szelényi, 1938</p>
83285	Animalia		Arthropoda			Insecta			Hymenoptera			PLATYGASTROIDEA	Platygastridae	Sceliotrachelinae			Fidiobia		hispanica				Popovici &amp; Buhl, 2010	<p style="margin-left: 40px;"><i>synergorum</i> misident. </p>							Ireland		added by Popovici &amp; Buhl (2010); recorded as Fidiobia synergorum (Kieffer, 1921, Fahringeria) by O'Connor et al. (2004)​.
83286	Animalia		Arthropoda			Insecta			Hymenoptera			PLATYGASTROIDEA	Platygastridae	Sceliotrachelinae			Platystasius						Nixon, 1937	<p style="margin-left: 40px;"><i>ANOPEDIELLA</i> Sundholm, 1956</p>
83287	Animalia		Arthropoda			Insecta			Hymenoptera			PLATYGASTROIDEA	Platygastridae	Sceliotrachelinae			Platystasius		transversus				(Thomson, 1859)	<p style="margin-left: 40px;"><i>Anopedias transversus </i>Thomson, 1859</p><p style="margin-left: 40px;"><i>strangaliophagus</i> Nixon, 1937 </p>							England, Scotland, Ireland
83288	Animalia		Arthropoda			Insecta			Hymenoptera			PLATYGASTROIDEA
83289	Animalia		Arthropoda			Insecta			Hymenoptera			PLATYGASTROIDEA	Scelionidae										Haliday, 1839										Some distribution data from O’Connor &amp; Notton (2013).
83290	Animalia		Arthropoda			Insecta			Hymenoptera			PLATYGASTROIDEA	Scelionidae	Scelioninae									Haliday, 1839
83291	Animalia		Arthropoda			Insecta			Hymenoptera			PLATYGASTROIDEA	Scelionidae	Scelioninae			Anteris						Förster, 1856	<p style="margin-left: 40px;"><i>PARATRIMORUS</i> Kieffer, 1908</p><p style="margin-left: 40px;"><i>TRICHACOLUS</i> Kieffer, 1912</p>
83292	Animalia		Arthropoda			Insecta			Hymenoptera			PLATYGASTROIDEA	Scelionidae	Scelioninae			Anteris		aethra				(Walker, 1836)	<p style="margin-left: 40px;"><i>Telenomus aethra </i>Walker, 1836</p>							England, Wales		Transferred from Opisthacantha by Notton (2006), who provides distribution data.
83293	Animalia		Arthropoda			Insecta			Hymenoptera			PLATYGASTROIDEA	Scelionidae	Scelioninae			Anteris		asramanes				(Walker, 1836)	<p style="margin-left: 40px;"><i>Trimorus asramanes </i>Walker, 1836</p><p style="margin-left: 40px;"><i>erdosi</i> (Szabó, 1958, <i>Paratrimorus</i>) </p>							England, Ireland		Transferred from Trimorus by Notton (2006), who provides distribution data.
83294	Animalia		Arthropoda			Insecta			Hymenoptera			PLATYGASTROIDEA	Scelionidae	Scelioninae			Baeus						Haliday, 1833	<p style="margin-left: 40px;"><i>HYPERBAEUS</i> Förster, 1856</p><p style="margin-left: 40px;"><i>PSILOBAEUS</i> Kieffer, 1926</p>
83295	Animalia		Arthropoda			Insecta			Hymenoptera			PLATYGASTROIDEA	Scelionidae	Scelioninae			Baeus		seminulum				Haliday, 1833								England, Ireland
83296	Animalia		Arthropoda			Insecta			Hymenoptera			PLATYGASTROIDEA	Scelionidae	Scelioninae			Eremioscelio						Priesner, 1951
83297	Animalia		Arthropoda			Insecta			Hymenoptera			PLATYGASTROIDEA	Scelionidae	Scelioninae			Eremioscelio		cydnoides				Priesner, 1951								England		added by Notton (2006)
83298	Animalia		Arthropoda			Insecta			Hymenoptera			PLATYGASTROIDEA	Scelionidae	Scelioninae			Gryon						Haliday, 1833	<p style="margin-left: 40px;"><i>ACOLUS</i> Förster, 1856</p><p style="margin-left: 40px;"><i>HADRONOTUS</i> Förster, 1856</p><p style="margin-left: 40px;"><i>MUSCIDEA</i> Motschoulsky, 1863</p><p style="margin-left: 40px;"><i>PLESIOBAEUS</i> Kieffer, 1913</p>
83299	Animalia		Arthropoda			Insecta			Hymenoptera			PLATYGASTROIDEA	Scelionidae	Scelioninae			Gryon		hospes				(Kieffer, 1913)	<p style="margin-left: 40px;"><i>Plesiobaeus hospes </i>Kieffer, 1913</p>
83300	Animalia		Arthropoda			Insecta			Hymenoptera			PLATYGASTROIDEA	Scelionidae	Scelioninae			Gryon		misellum				Haliday, 1833	<p style="margin-left: 40px;"><i>pumilio</i> (Nees, 1834, <i>Teleas</i>) </p><p style="margin-left: 40px;"><i>divisus</i> (Wollaston, 1858, <i>Telenomus</i>) </p><p style="margin-left: 40px;"><i>opacus</i> (Thomson, 1859, <i>Acolus</i>) </p><p style="margin-left: 40px;"><i>basalis</i> (Thomson, 1859, <i>Acolus</i>) </p><p style="margin-left: 40px;"><i>sagax</i> (Kieffer, 1908, <i>Plastogryon</i>)…							Ireland
83301	Animalia		Arthropoda			Insecta			Hymenoptera			PLATYGASTROIDEA	Scelionidae	Scelioninae			Idris						Förster, 1856	<p style="margin-left: 40px;"><i>ACOLOIDES</i> Howard, 1890</p><p style="margin-left: 40px;"><i>CERATOBAEUS</i> Ashmead, 1893</p><p style="margin-left: 40px;"><i>PSEUDOBAEUS</i> Perkins, 1910</p><p style="margin-left: 40px;"><i>DISSACOLUS</i> Kieffer, 1926</p><p style="margin-left: 40px;"><i>MEGACOLUS</i> Priesner, 1951</p>
83302	Animalia		Arthropoda			Insecta			Hymenoptera			PLATYGASTROIDEA	Scelionidae	Scelioninae			Idris		flavicornis				Förster, 1856	<p style="margin-left: 40px;"><i>krygeri</i> (Kieffer, 1910, <i>Acolus</i>) </p>							England, Wales		added by Notton (2006)
83303	Animalia		Arthropoda			Insecta			Hymenoptera			PLATYGASTROIDEA	Scelionidae	Scelioninae			Macroteleia						Westwood, 1835	<p style="margin-left: 40px;"><i>BAEONEURA</i> Förster, 1856</p><p style="margin-left: 40px;"><i>PROSAPEGUS</i> Kieffer, 1908</p><p style="margin-left: 40px;"><i>PARAPEGUS</i> Kieffer, 1908</p>
83304	Animalia		Arthropoda			Insecta			Hymenoptera			PLATYGASTROIDEA	Scelionidae	Scelioninae			Macroteleia		atrata				Kozloz &amp; Kononova, 1987								England		added by Notton (2006)
83305	Animalia		Arthropoda			Insecta			Hymenoptera			PLATYGASTROIDEA	Scelionidae	Scelioninae			Macroteleia		bicolora				Kieffer, 1908								England		added by Notton et al. (2014)
83306	Animalia		Arthropoda			Insecta			Hymenoptera			PLATYGASTROIDEA	Scelionidae	Scelioninae			Macroteleia		brevigaster				Masner, 1976	<p style="margin-left: 40px;"><i>punctata</i> (Kieffer, 1908, <i>Apegus</i>)</p><p style="margin-left: 40px;"><i>?minor</i> Kozloz &amp; Kononova, 1987 </p>							England		added by Notton (2006)
83307	Animalia		Arthropoda			Insecta			Hymenoptera			PLATYGASTROIDEA	Scelionidae	Scelioninae			Psilanteris						Kieffer, 1916	<p style="margin-left: 40px;"><i>OXYPHANURUS</i> Kieffer, 1926</p>
83308	Animalia		Arthropoda			Insecta			Hymenoptera			PLATYGASTROIDEA	Scelionidae	Scelioninae			Psilanteris		bicolor				(Kieffer, 1908)	<p style="margin-left: 40px;"><i>Anteris bicolor </i>Kieffer, 1908</p>							England, Wales		added by Notton (2006)
83309	Animalia		Arthropoda			Insecta			Hymenoptera			PLATYGASTROIDEA	Scelionidae	Scelioninae			Scelio						Latreille, 1805	<p style="margin-left: 40px;"><i>ALERIA</i> Marshall, 1874</p><p style="margin-left: 40px;"><i>CALOPTENOBIA</i> Riley, 1878</p><p style="margin-left: 40px;"><i>ENNEASCELIO</i> Kieffer, 1910</p>
83310	Animalia		Arthropoda			Insecta			Hymenoptera			PLATYGASTROIDEA	Scelionidae	Scelioninae			Scelio		rugulosus				Latreille, 1805
83311	Animalia		Arthropoda			Insecta			Hymenoptera			PLATYGASTROIDEA	Scelionidae	Scelioninae			Scelio		vulgaris				Kieffer, 1908								Ireland		added by O’Connor et al. (2004)
83312	Animalia		Arthropoda			Insecta			Hymenoptera			PLATYGASTROIDEA	Scelionidae	Scelioninae			Scelio		walkeri				Kieffer, 1913
83313	Animalia		Arthropoda			Insecta			Hymenoptera			PLATYGASTROIDEA	Scelionidae	Scelioninae			Thoron						Haliday, 1833	<p style="margin-left: 40px;"><i>NEOTHORON</i> Masner, 1972</p>									Distribution and synonymy from Johnson &amp; Masner (2004).
83314	Animalia		Arthropoda			Insecta			Hymenoptera			PLATYGASTROIDEA	Scelionidae	Scelioninae			Thoron		metallicus				Haliday, 1833	<p style="margin-left: 40px;"><i>fornicatus</i> (Nees, 1834, <i>Teleas</i>) </p><p style="margin-left: 40px;"><i>solidus</i> (Nees, 1834, <i>Teleas</i>) </p><p style="margin-left: 40px;"><i>gibbus</i> Ruthe, 1859 </p><p style="margin-left: 40px;"><i>nepea</i> (Ferrière, 1916, <i>Anteris</i>) </p>							England, Ireland
83315	Animalia		Arthropoda			Insecta			Hymenoptera			PLATYGASTROIDEA	Scelionidae	Scelioninae			Tiphodytes						Bradley, 1902	<p style="margin-left: 40px;"><i>LIMNODYTES</i> Marchal, 1900</p><p style="margin-left: 40px;"><i>HUNGAROSCELIO</i> Szabó, 1957</p>
83316	Animalia		Arthropoda			Insecta			Hymenoptera			PLATYGASTROIDEA	Scelionidae	Scelioninae			Tiphodytes		gerriphagus				(Marchal, 1901)	<p style="margin-left: 40px;"><i>Limnodytes gerriphagus </i>Marchal, 1901</p><p style="margin-left: 40px;"><i>kaszabi</i> (Szabó, 1957, <i>Hungaroscelio</i>) </p>							England, Ireland		added by Notton (2006)
83317	Animalia		Arthropoda			Insecta			Hymenoptera			PLATYGASTROIDEA	Scelionidae	Teleasinae									Ashmead, 1893										Some distribution data from O’Connor &amp; Notton (2013).
83318	Animalia		Arthropoda			Insecta			Hymenoptera			PLATYGASTROIDEA	Scelionidae	Teleasinae			Teleas						Latreille, 1809	<p style="margin-left: 40px;"><i>PROTELEAS</i> Kozlov, 1961</p>
83319	Animalia		Arthropoda			Insecta			Hymenoptera			PLATYGASTROIDEA	Scelionidae	Teleasinae			Teleas		brasilas				Walker, 1836
83320	Animalia		Arthropoda			Insecta			Hymenoptera			PLATYGASTROIDEA	Scelionidae	Teleasinae			Teleas		clavicornis				(Latreille, 1805)	<p style="margin-left: 40px;"><i>Scelio clavicornis </i>Latreille, 1805</p><p style="margin-left: 40px;"><i>longicornis</i> (Latreille, 1806, <i>Scelio</i>) </p>							Ireland
83321	Animalia		Arthropoda			Insecta			Hymenoptera			PLATYGASTROIDEA	Scelionidae	Teleasinae			Teleas		coriaceus				Kieffer, 1908
83322	Animalia		Arthropoda			Insecta			Hymenoptera			PLATYGASTROIDEA	Scelionidae	Teleasinae			Teleas		pulex				Walker, 1836								Ireland
83323	Animalia		Arthropoda			Insecta			Hymenoptera			PLATYGASTROIDEA	Scelionidae	Teleasinae			Teleas		sibiricus				Kieffer, 1908	<p style="margin-left: 40px;"><i>myrmecobius</i> Kieffer, 1911 </p>
83324	Animalia		Arthropoda			Insecta			Hymenoptera			PLATYGASTROIDEA	Scelionidae	Teleasinae			Trimorus						Förster, 1856	<p style="margin-left: 40px;"><i>TRICHASIUS</i> Provancher, 1887</p><p style="margin-left: 40px;"><i>PENTACANTHA</i> Ashmead, 1888</p><p style="margin-left: 40px;"><i>HOPLOGRYON</i> Ashmead, 1893</p><p style="margin-left: 40px;"><i>PARAGRYON</i> Kieffer, 1908</p><p style="margin-left: 40px;"><i>ALLOGRYON</i> Kieffer, 1910</p><p style="margin-left: 40px;"><i>HEMIMORUS</i> Cameron, 1912</p><p style…
83325	Animalia		Arthropoda			Insecta			Hymenoptera			PLATYGASTROIDEA	Scelionidae	Teleasinae			Trimorus		aegle				(Walker, 1836)	<p style="margin-left: 40px;"><i>Teleas aegle </i>Walker, 1836</p>							England, Scotland, Ireland
83326	Animalia		Arthropoda			Insecta			Hymenoptera			PLATYGASTROIDEA	Scelionidae	Teleasinae			Trimorus		algicola				(Kieffer, 1911)	<p style="margin-left: 40px;"><i>Paragryon algicola </i>Kieffer, 1911</p>
83327	Animalia		Arthropoda			Insecta			Hymenoptera			PLATYGASTROIDEA	Scelionidae	Teleasinae			Trimorus		angustipennis				(Kieffer, 1908)	<p style="margin-left: 40px;"><i>Hoplogryon angustipennis </i>Kieffer, 1908</p>
83328	Animalia		Arthropoda			Insecta			Hymenoptera			PLATYGASTROIDEA	Scelionidae	Teleasinae			Trimorus		antennalis				(Kieffer, 1908)	<p style="margin-left: 40px;"><i>Hoplogryon antennalis </i>Kieffer, 1908</p>							Scotland
83329	Animalia		Arthropoda			Insecta			Hymenoptera			PLATYGASTROIDEA	Scelionidae	Teleasinae			Trimorus		apricans				(Walker, 1836)	<p style="margin-left: 40px;"><i>Teleas apricans </i>Walker, 1836</p>							Ireland
83330	Animalia		Arthropoda			Insecta			Hymenoptera			PLATYGASTROIDEA	Scelionidae	Teleasinae			Trimorus		aratus				(Walker, 1836)	<p style="margin-left: 40px;"><i>Teleas aratus </i>Walker, 1836</p>							England, Wales, Ireland
83331	Animalia		Arthropoda			Insecta			Hymenoptera			PLATYGASTROIDEA	Scelionidae	Teleasinae			Trimorus		bacilliger				(Kieffer, 1908)	<p style="margin-left: 40px;"><i>Hoplogryon bacilliger </i>Kieffer, 1908</p>							Scotland, Ireland		Although described from Scotland by Kieffer (1908), listed as a synonym of Trimorus pedestris (Nees) (now placed in Gryon) by Fergusson (1978) until raised from synonymy by O’Connor &amp; Mineo (2008).
83332	Animalia		Arthropoda			Insecta			Hymenoptera			PLATYGASTROIDEA	Scelionidae	Teleasinae			Trimorus		bassus				(Walker, 1836)	<p style="margin-left: 40px;"><i>Teleas bassus </i>Walker, 1836</p>
83333	Animalia		Arthropoda			Insecta			Hymenoptera			PLATYGASTROIDEA	Scelionidae	Teleasinae			Trimorus		brevicollis				(Thomson, 1859)	<p style="margin-left: 40px;"><i>Prosacantha brevicollis </i>Thomson, 1859</p>
83334	Animalia		Arthropoda			Insecta			Hymenoptera			PLATYGASTROIDEA	Scelionidae	Teleasinae			Trimorus		cameroni				(Kieffer, 1908)	<p style="margin-left: 40px;"><i>Hoplogryon cameroni </i>Kieffer, 1908</p>							Scotland
83335	Animalia		Arthropoda			Insecta			Hymenoptera			PLATYGASTROIDEA	Scelionidae	Teleasinae			Trimorus		carinatus				(Kieffer, 1908)	<p style="margin-left: 40px;"><i>Hoplogryon carinatus </i>Kieffer, 1908</p>
83336	Animalia		Arthropoda			Insecta			Hymenoptera			PLATYGASTROIDEA	Scelionidae	Teleasinae			Trimorus		carinifrons				(Kieffer, 1908)	<p style="margin-left: 40px;"><i>Hoplogryon carinifrons </i>Kieffer, 1908</p>							Scotland
83337	Animalia		Arthropoda			Insecta			Hymenoptera			PLATYGASTROIDEA	Scelionidae	Teleasinae			Trimorus		cephisus				(Walker, 1836)	<p style="margin-left: 40px;"><i>Teleas cephisus </i>Walker, 1836</p>
83338	Animalia		Arthropoda			Insecta			Hymenoptera			PLATYGASTROIDEA	Scelionidae	Teleasinae			Trimorus		chesias				(Walker, 1836)	<p style="margin-left: 40px;"><i>Teleas chesias </i>Walker, 1836</p>
83339	Animalia		Arthropoda			Insecta			Hymenoptera			PLATYGASTROIDEA	Scelionidae	Teleasinae			Trimorus		chyllene				(Walker, 1836)	<p style="margin-left: 40px;"><i>Teleas chyllene </i>Walker, 1836</p>
83340	Animalia		Arthropoda			Insecta			Hymenoptera			PLATYGASTROIDEA	Scelionidae	Teleasinae			Trimorus		elatior				(Walker, 1836)	<p style="margin-left: 40px;"><i>Teleas elatior </i>Walker, 1836</p>							England, Scotland, Ireland
83341	Animalia		Arthropoda			Insecta			Hymenoptera			PLATYGASTROIDEA	Scelionidae	Teleasinae			Trimorus		elongatus				(Kieffer, 1908)	<p style="margin-left: 40px;"><i>Hoplogryon elongatus </i>Kieffer, 1908</p>							England, Ireland		Although described from probable English material by Kieffer (1908), listed as a synonym of puncticollis by Fergusson (1978) but raised from synonymy by Kozlov (1978).
83342	Animalia		Arthropoda			Insecta			Hymenoptera			PLATYGASTROIDEA	Scelionidae	Teleasinae			Trimorus		ephippium				(Walker, 1836)	<p style="margin-left: 40px;"><i>Teleas ephippium </i>Walker, 1836</p>							England, Ireland
83343	Animalia		Arthropoda			Insecta			Hymenoptera			PLATYGASTROIDEA	Scelionidae	Teleasinae			Trimorus		flavipes				(Walker, 1836)	<p style="margin-left: 40px;"><i>Teleas flavipes </i>Walker, 1836</p><p style="margin-left: 40px;"><i>angustula</i> (Thomson, 1859, <i>Prosacantha</i>) </p><p style="margin-left: 40px;"><i>rufipes</i> (Thomson, 1859, <i>Prosacantha</i>) </p><p style="margin-left: 40px;"><i>similis</i> (Thomson, 1859, <i>Prosacantha</i>) </p><p style="margin-left: 40px;"><i>cursor</i> (Kieffer, 1908, <i>Hoplogryon…							England, Scotland, Ireland
83344	Animalia		Arthropoda			Insecta			Hymenoptera			PLATYGASTROIDEA	Scelionidae	Teleasinae			Trimorus		galba				(Walker, 1836)	<p style="margin-left: 40px;"><i>Teleas galba </i>Walker, 1836</p>
83345	Animalia		Arthropoda			Insecta			Hymenoptera			PLATYGASTROIDEA	Scelionidae	Teleasinae			Trimorus		glaucus				(Walker, 1836)	<p style="margin-left: 40px;"><i>Teleas glaucus </i>Walker, 1836</p>
83346	Animalia		Arthropoda			Insecta			Hymenoptera			PLATYGASTROIDEA	Scelionidae	Teleasinae			Trimorus		halteratus				(Kieffer, 1912)	<p style="margin-left: 40px;"><i>Hoplogryon halterata </i>Kieffer, 1912</p>
83347	Animalia		Arthropoda			Insecta			Hymenoptera			PLATYGASTROIDEA	Scelionidae	Teleasinae			Trimorus		lamus				(Walker, 1836)	<p style="margin-left: 40px;"><i>Teleas lamus </i>Walker, 1836</p>							Ireland
83348	Animalia		Arthropoda			Insecta			Hymenoptera			PLATYGASTROIDEA	Scelionidae	Teleasinae			Trimorus		levigena				(Kieffer, 1908)	<p style="margin-left: 40px;"><i>Hoplogryon levigena </i>Kieffer, 1908</p>							Scotland
83349	Animalia		Arthropoda			Insecta			Hymenoptera			PLATYGASTROIDEA	Scelionidae	Teleasinae			Trimorus		lycaon				(Walker, 1836)	<p style="margin-left: 40px;"><i>Teleas lycaon </i>Walker, 1836</p>
83350	Animalia		Arthropoda			Insecta			Hymenoptera			PLATYGASTROIDEA	Scelionidae	Teleasinae			Trimorus		marshalli				(Kieffer, 1913)	<p style="margin-left: 40px;"><i>Hoplogryon marshalli </i>Kieffer, 1913</p>
83351	Animalia		Arthropoda			Insecta			Hymenoptera			PLATYGASTROIDEA	Scelionidae	Teleasinae			Trimorus		micropterus				(Kieffer, 1908)	<p style="margin-left: 40px;"><i>Hoplogryon micropterus </i>Kieffer, 1908</p>							Scotland
83352	Animalia		Arthropoda			Insecta			Hymenoptera			PLATYGASTROIDEA	Scelionidae	Teleasinae			Trimorus		myrmecobius				(Kieffer, 1911)	<p style="margin-left: 40px;"><i>Hoplogryon myrmecobius </i>Kieffer, 1911</p>
83353	Animalia		Arthropoda			Insecta			Hymenoptera			PLATYGASTROIDEA	Scelionidae	Teleasinae			Trimorus		myrmecophilus				(Kieffer, 1911)	<p style="margin-left: 40px;"><i>Paragryon myrmecophilus </i>Kieffer, 1911</p>
83354	Animalia		Arthropoda			Insecta			Hymenoptera			PLATYGASTROIDEA	Scelionidae	Teleasinae			Trimorus		nanno				(Walker, 1836)	<p style="margin-left: 40px;"><i>Gryon nanno </i>Walker, 1836</p>
83355	Animalia		Arthropoda			Insecta			Hymenoptera			PLATYGASTROIDEA	Scelionidae	Teleasinae			Trimorus		nitidulus				(Thomson, 1859)	<p style="margin-left: 40px;"><i>Prosacantha nitidula </i>Thomson, 1859</p><p style="margin-left: 40px;"><i>pleuralis</i> (Kieffer, 1908, <i>Hoplogryon</i>) preocc.</p><p style="margin-left: 40px;"><i>cursitans</i> (Kieffer, 1908, <i>Hoplogryon</i>) </p><p style="margin-left: 40px;"><i>fulvimanus</i> (Kieffer, 1908, <i>Hoplogryon</i>) </p><p style="margin-left: 40px;"><i>pleuricus</i> (Kieffer, 1…							England
83356	Animalia		Arthropoda			Insecta			Hymenoptera			PLATYGASTROIDEA	Scelionidae	Teleasinae			Trimorus		ocyroe				(Walker, 1836)	<p style="margin-left: 40px;"><i>Teleas ocyroe </i>Walker, 1836</p>
83357	Animalia		Arthropoda			Insecta			Hymenoptera			PLATYGASTROIDEA	Scelionidae	Teleasinae			Trimorus		opacus				(Thomson, 1859)	<p style="margin-left: 40px;"><i>Prosacantha opaca </i>Thomson, 1859</p><p style="margin-left: 40px;"><i>pedestris</i> misident. </p>							Ireland
83358	Animalia		Arthropoda			Insecta			Hymenoptera			PLATYGASTROIDEA	Scelionidae	Teleasinae			Trimorus		ovatus				(Thomson, 1859)	<p style="margin-left: 40px;"><i>Prosacantha ovata </i>Thomson, 1859</p><p style="margin-left: 40px;"><i>orbiculatus</i> (Thomson, 1859, <i>Prosacantha</i>) </p><p style="margin-left: 40px;"><i>petiolaris</i> (Thomson, 1859, <i>Prosacantha</i>) </p><p style="margin-left: 40px;"><i>rotundiventris</i> (Thomson, 1859, <i>Prosacantha</i>) </p>
83359	Animalia		Arthropoda			Insecta			Hymenoptera			PLATYGASTROIDEA	Scelionidae	Teleasinae			Trimorus		paula				(Walker, 1836)	<p style="margin-left: 40px;"><i>Teleas paula </i>Walker, 1836</p>							England, Wales, Ireland
83360	Animalia		Arthropoda			Insecta			Hymenoptera			PLATYGASTROIDEA	Scelionidae	Teleasinae			Trimorus		procris				(Walker, 1836)	<p style="margin-left: 40px;"><i>Teleas procris </i>Walker, 1836</p>							England, Ireland
83361	Animalia		Arthropoda			Insecta			Hymenoptera			PLATYGASTROIDEA	Scelionidae	Teleasinae			Trimorus		punctatifrons				(Kieffer, 1908)	<p style="margin-left: 40px;"><i>Hoplogryon punctatifrons </i>Kieffer, 1908</p>							Scotland
83362	Animalia		Arthropoda			Insecta			Hymenoptera			PLATYGASTROIDEA	Scelionidae	Teleasinae			Trimorus		puncticollis				(Thomson, 1859)	<p style="margin-left: 40px;"><i>Prosacantha puncticollis </i>Thomson, 1859</p><p style="margin-left: 40px;"><i>hylanipennis</i> (Thomson, 1859, <i>Prosacantha</i>) </p><p style="margin-left: 40px;"><i>coxalis</i> (Thomson, 1859, <i>Prosacantha</i>) </p>
83363	Animalia		Arthropoda			Insecta			Hymenoptera			PLATYGASTROIDEA	Scelionidae	Teleasinae			Trimorus		rufonotatus				(Kieffer, 1908)	<p style="margin-left: 40px;"><i>Hoplogryon rufonotatus </i>Kieffer, 1908</p>							England, Scotland, Ireland
83364	Animalia		Arthropoda			Insecta			Hymenoptera			PLATYGASTROIDEA	Scelionidae	Teleasinae			Trimorus		sectigena				(Kieffer, 1908)	<p style="margin-left: 40px;"><i>Hoplogryon sectigena </i>Kieffer, 1908</p>							Ireland		added by O’Connor &amp; Mineo (2008)
83365	Animalia		Arthropoda			Insecta			Hymenoptera			PLATYGASTROIDEA	Scelionidae	Teleasinae			Trimorus		striatigena				(Kieffer, 1908)	<p style="margin-left: 40px;"><i>Hoplogryon striatigena </i>Kieffer, 1908</p>							Scotland
83366	Animalia		Arthropoda			Insecta			Hymenoptera			PLATYGASTROIDEA	Scelionidae	Teleasinae			Trimorus		therycides				(Walker, 1836)	<p style="margin-left: 40px;"><i>Teleas therycides </i>Walker, 1836</p><p style="margin-left: 40px;"><i>doto</i> (Walker, 1836, <i>Teleas</i>) </p><p style="margin-left: 40px;"><i>mermerus</i> (Walker, 1836, <i>Teleas</i>) </p><p style="margin-left: 40px;"><i>smerdis</i> (Walker, 1836, <i>Teleas</i>) </p><p style="margin-left: 40px;"><i>pallipes</i> (Thomson, 1859, <i>Prosacantha</i>) </p><p styl…							England, Scotland, Ireland
83367	Animalia		Arthropoda			Insecta			Hymenoptera			PLATYGASTROIDEA	Scelionidae	Teleasinae			Trimorus		timareta				(Walker, 1836)	<p style="margin-left: 40px;"><i>Teleas timareta </i>Walker, 1836</p>							England, Scotland, Ireland
83368	Animalia		Arthropoda			Insecta			Hymenoptera			PLATYGASTROIDEA	Scelionidae	Teleasinae			Trimorus		tuberculatus				(Kieffer, 1908)	<p style="margin-left: 40px;"><i>Hoplogryon tuberculatus </i>Kieffer, 1908</p>							Ireland		added by O’Connor &amp; Mineo (2008)
83369	Animalia		Arthropoda			Insecta			Hymenoptera			PLATYGASTROIDEA	Scelionidae	Teleasinae			Trimorus		varicornis				(Walker, 1836)	<p style="margin-left: 40px;"><i>Teleas varicornis </i>Walker, 1836</p><p style="margin-left: 40px;"><i>metabus</i> (Walker, 1836, <i>Teleas</i>) </p><p style="margin-left: 40px;"><i>minor</i> (Thomson, 1859, <i>Prosacantha</i>) </p><p style="margin-left: 40px;"><i>grandis</i> (Thomson, 1859, <i>Prosacantha</i>) </p><p style="margin-left: 40px;"><i>spinosa</i> (Szépligeti, 1901, <i>Prosacantha</i…							England, Ireland
83370	Animalia		Arthropoda			Insecta			Hymenoptera			PLATYGASTROIDEA	Scelionidae	Teleasinae			Trimorus		xenetus				(Walker, 1836)	<p style="margin-left: 40px;"><i>Teleas xenetus </i>Walker, 1836</p>
83371	Animalia		Arthropoda			Insecta			Hymenoptera			PLATYGASTROIDEA	Scelionidae	Teleasinae			Xenomerus						Walker, 1836	<p style="margin-left: 40px;"><i>NITEOGRYON</i> Szabó, 1966</p>									Distribution data and synonymy from Mikó et al. (2010).
83372	Animalia		Arthropoda			Insecta			Hymenoptera			PLATYGASTROIDEA	Scelionidae	Teleasinae			Xenomerus		canariensis				Huggert, 1974	<p style="margin-left: 40px;"><i>hibernicus</i> Mineo &amp; O’Connor, 2009 </p><p style="margin-left: 40px;"><i>mutator</i> (Kononova &amp; Kozlov, 2001, <i>Trimorus</i>) </p>							Ireland		added by Mineo &amp; O’Connor (2009)
83373	Animalia		Arthropoda			Insecta			Hymenoptera			PLATYGASTROIDEA	Scelionidae	Teleasinae			Xenomerus		ergenna				Walker, 1836	<p style="margin-left: 40px;"><i>medon</i> (Walker, 1836, <i>Teleas</i>) </p><p style="margin-left: 40px;"><i>curtum</i> (Kononova &amp; Petrov, 1999, <i>Trimorus</i>) </p>							England, Ireland
83374	Animalia		Arthropoda			Insecta			Hymenoptera			PLATYGASTROIDEA	Scelionidae	Telenominae									Ashmead, 1893										Some distribution data from O’Connor &amp; Notton (2013).
83375	Animalia		Arthropoda			Insecta			Hymenoptera			PLATYGASTROIDEA	Scelionidae	Telenominae			Telenomus						Haliday, 1833	<p style="margin-left: 40px;"><i>HEMISIUS</i> Westwood, 1833</p><p style="margin-left: 40px;"><i>PHANURUS</i> Thomson, 1861</p><p style="margin-left: 40px;"><i>DISSOLCUS</i> Ashmead, 1893</p><p style="margin-left: 40px;"><i>NEONECREMNUS</i> Brèthes, 1909</p><p style="margin-left: 40px;"><i>ALLOPHANURUS</i> Kieffer, 1912</p><p style="margin-left: 40px;"><i>HOMOPHANURUS</i> Kieffer, 1912</p><p styl…
83376	Animalia		Arthropoda			Insecta			Hymenoptera			PLATYGASTROIDEA	Scelionidae	Telenominae			Telenomus		alcon				Walker, 1836
83377	Animalia		Arthropoda			Insecta			Hymenoptera			PLATYGASTROIDEA	Scelionidae	Telenominae			Telenomus		andria				Walker, 1836								Ireland
83378	Animalia		Arthropoda			Insecta			Hymenoptera			PLATYGASTROIDEA	Scelionidae	Telenominae			Telenomus		ater				Haliday, 1833
83379	Animalia		Arthropoda			Insecta			Hymenoptera			PLATYGASTROIDEA	Scelionidae	Telenominae			Telenomus		brachialis				Haliday, 1833								Wales, Ireland
83380	Animalia		Arthropoda			Insecta			Hymenoptera			PLATYGASTROIDEA	Scelionidae	Telenominae			Telenomus		cleostratus				Walker, 1836
83381	Animalia		Arthropoda			Insecta			Hymenoptera			PLATYGASTROIDEA	Scelionidae	Telenominae			Telenomus		coilus				Walker, 1836								Ireland
83382	Animalia		Arthropoda			Insecta			Hymenoptera			PLATYGASTROIDEA	Scelionidae	Telenominae			Telenomus		colotes				Walker, 1836
83383	Animalia		Arthropoda			Insecta			Hymenoptera			PLATYGASTROIDEA	Scelionidae	Telenominae			Telenomus		dalmanni				(Ratzeburg, 1844)	<p style="margin-left: 40px;"><i>Teleas dalmanni </i>Ratzeburg, 1844</p><p style="margin-left: 40px;"><i>orgyiae</i> Fitch, 1865 </p><p style="margin-left: 40px;"><i>fiskei</i> Brues, 1910 </p>							Ireland
83384	Animalia		Arthropoda			Insecta			Hymenoptera			PLATYGASTROIDEA	Scelionidae	Telenominae			Telenomus		danubialis				(Szelényi, 1939)	<p style="margin-left: 40px;"><i>Platytelenomus danubialis </i>Szelényi, 1939</p><p style="margin-left: 40px;"><i>unilineatus</i> (Szabó, 1975, <i>Platytelenomus</i>)</p>							England
83385	Animalia		Arthropoda			Insecta			Hymenoptera			PLATYGASTROIDEA	Scelionidae	Telenominae			Telenomus		depressus				(Szabó, 1975)	<p style="margin-left: 40px;"><i>Verrucosicephalia depressa </i>Szabó, 1975</p>							Ireland		Added by Mineo et al. (2011) as a species of Verrucosicephalia.
83386	Animalia		Arthropoda			Insecta			Hymenoptera			PLATYGASTROIDEA	Scelionidae	Telenominae			Telenomus		dorsennus				Walker, 1836
83387	Animalia		Arthropoda			Insecta			Hymenoptera			PLATYGASTROIDEA	Scelionidae	Telenominae			Telenomus		eris				Walker, 1836								Ireland
83388	Animalia		Arthropoda			Insecta			Hymenoptera			PLATYGASTROIDEA	Scelionidae	Telenominae			Telenomus		fergussoni				Buhl &amp; O’Connor, 2012								Ireland		added by Buhl &amp; O’Connor (2012a)
83389	Animalia		Arthropoda			Insecta			Hymenoptera			PLATYGASTROIDEA	Scelionidae	Telenominae			Telenomus		heliodorus				Mineo, 2006								Ireland		added by O’Connor &amp; Notton (2013)
83390	Animalia		Arthropoda			Insecta			Hymenoptera			PLATYGASTROIDEA	Scelionidae	Telenominae			Telenomus		heteropterus				Haliday, 1833	<p style="margin-left: 40px;"><i>nonnitens</i> Szabó, 1978 </p><p style="margin-left: 40px;"><i>pappi</i> Szabó, 1978 </p>							Ireland
83391	Animalia		Arthropoda			Insecta			Hymenoptera			PLATYGASTROIDEA	Scelionidae	Telenominae			Telenomus		heydeni				Mayr, 1879								Ireland		added by O’Connor &amp; Mineo (2006)
83392	Animalia		Arthropoda			Insecta			Hymenoptera			PLATYGASTROIDEA	Scelionidae	Telenominae			Telenomus		horus				Walker, 1836
83393	Animalia		Arthropoda			Insecta			Hymenoptera			PLATYGASTROIDEA	Scelionidae	Telenominae			Telenomus		kolbei				Mayr, 1879								Ireland		added by Buhl &amp; O’Connor (2011c)
83394	Animalia		Arthropoda			Insecta			Hymenoptera			PLATYGASTROIDEA	Scelionidae	Telenominae			Telenomus		laeviusculus				(Ratzeburg, 1844)	<p style="margin-left: 40px;"><i>Teleas laeviusculus </i>Ratzeburg, 1844</p>							Ireland		added by O’Connor &amp; Mineo (2013)
83395	Animalia		Arthropoda			Insecta			Hymenoptera			PLATYGASTROIDEA	Scelionidae	Telenominae			Telenomus		laricis				Walker, 1836								Ireland		Listed by Mineo et al. (2011) as a species of Verrucosicephalia.
83396	Animalia		Arthropoda			Insecta			Hymenoptera			PLATYGASTROIDEA	Scelionidae	Telenominae			Telenomus		longulus				Kozlov, 1967								Ireland		added by O’Connor &amp; Mineo (2009)
83397	Animalia		Arthropoda			Insecta			Hymenoptera			PLATYGASTROIDEA	Scelionidae	Telenominae			Telenomus		lopicida				Silvestri, 1932								Ireland		added by O’Connor &amp; Mineo (2013)
83398	Animalia		Arthropoda			Insecta			Hymenoptera			PLATYGASTROIDEA	Scelionidae	Telenominae			Telenomus		mentes				Walker, 1838
83399	Animalia		Arthropoda			Insecta			Hymenoptera			PLATYGASTROIDEA	Scelionidae	Telenominae			Telenomus		minutus				(Westwood, 1833)	<p style="margin-left: 40px;"><i>Hemisius minutus </i>Westwood, 1833</p>
83400	Animalia		Arthropoda			Insecta			Hymenoptera			PLATYGASTROIDEA	Scelionidae	Telenominae			Telenomus		nauplius				Walker, 1836
83401	Animalia		Arthropoda			Insecta			Hymenoptera			PLATYGASTROIDEA	Scelionidae	Telenominae			Telenomus		nitidulus				(Thomson, 1861)	<p style="margin-left: 40px;"><i>Phanurus nitidulus </i>Thomson, 1861</p><p style="margin-left: 40px;"><i>punctulatus</i> (Ratzeburg, 1844, <i>Teleas</i>) </p><p style="margin-left: 40px;"><i>mayri</i> (Kieffer, 1912, <i>Prophanurus</i>) </p>							Ireland
83402	Animalia		Arthropoda			Insecta			Hymenoptera			PLATYGASTROIDEA	Scelionidae	Telenominae			Telenomus		orphne				Walker, 1836
83403	Animalia		Arthropoda			Insecta			Hymenoptera			PLATYGASTROIDEA	Scelionidae	Telenominae			Telenomus		othonia				Walker, 1836								England, Ireland
83404	Animalia		Arthropoda			Insecta			Hymenoptera			PLATYGASTROIDEA	Scelionidae	Telenominae			Telenomus		othus				Haliday, 1833								Ireland
83405	Animalia		Arthropoda			Insecta			Hymenoptera			PLATYGASTROIDEA	Scelionidae	Telenominae			Telenomus		phalaenarum				(Nees, 1834)	<p style="margin-left: 40px;"><i>Teleas phalaenarum </i>Nees, 1834</p>
83406	Animalia		Arthropoda			Insecta			Hymenoptera			PLATYGASTROIDEA	Scelionidae	Telenominae			Telenomus		phylias				Walker, 1836								Ireland
83407	Animalia		Arthropoda			Insecta			Hymenoptera			PLATYGASTROIDEA	Scelionidae	Telenominae			Telenomus		pilumnus				Walker, 1836
83408	Animalia		Arthropoda			Insecta			Hymenoptera			PLATYGASTROIDEA	Scelionidae	Telenominae			Telenomus		punctatissimus				(Ratzeburg, 1844)	<p style="margin-left: 40px;"><i>Teleas punctatissimus </i>Ratzeburg, 1844</p>
83409	Animalia		Arthropoda			Insecta			Hymenoptera			PLATYGASTROIDEA	Scelionidae	Telenominae			Telenomus		sitius				Walker, 1836
83410	Animalia		Arthropoda			Insecta			Hymenoptera			PLATYGASTROIDEA	Scelionidae	Telenominae			Telenomus		stilpo				Walker, 1836								Ireland
83411	Animalia		Arthropoda			Insecta			Hymenoptera			PLATYGASTROIDEA	Scelionidae	Telenominae			Telenomus		tetratomus				(Thomson, 1861)	<p style="margin-left: 40px;"><i>Phanurus tetratomus </i>Thomson, 1861</p><p style="margin-left: 40px;"><i>bombycis</i> Mayr, 1879 </p><p style="margin-left: 40px;"><i>gracilis</i> Mayr, 1879 </p><p style="margin-left: 40px;"><i>verticillatus</i> Kieffer, 1917 </p>
83412	Animalia		Arthropoda			Insecta			Hymenoptera			PLATYGASTROIDEA	Scelionidae	Telenominae			Telenomus		tritia				Walker, 1836
83413	Animalia		Arthropoda			Insecta			Hymenoptera			PLATYGASTROIDEA	Scelionidae	Telenominae			Telenomus		trophonius				Walker, 1836
83414	Animalia		Arthropoda			Insecta			Hymenoptera			PLATYGASTROIDEA	Scelionidae	Telenominae			Telenomus		truncatus				(Nees, 1834)	<p style="margin-left: 40px;"><i>Teleas truncatus </i>Nees, 1834</p><p style="margin-left: 40px;"><i>linnei</i> (Nees, 1834, <i>Teleas</i>) </p><p style="margin-left: 40px;"><i>zetterstedtii</i> (Ratzeburg, 1844, <i>Teleas</i>) </p>
83415	Animalia		Arthropoda			Insecta			Hymenoptera			PLATYGASTROIDEA	Scelionidae	Telenominae			Telenomus		turesis				Walker, 1836	<p style="margin-left: 40px;"><i>chloropus</i> (Thomson, 1861, <i>Phanurus</i>) </p><p style="margin-left: 40px;"><i>sokolowi</i> Mayr, 1897 </p>							England, Ireland
83416	Animalia		Arthropoda			Insecta			Hymenoptera			PLATYGASTROIDEA	Scelionidae	Telenominae			Telenomus		vibius				Walker, 1838								England, Ireland		Fergusson (1983b)
83417	Animalia		Arthropoda			Insecta			Hymenoptera			PLATYGASTROIDEA	Scelionidae	Telenominae			Telenomus		vinicius				Walker, 1836
83418	Animalia		Arthropoda			Insecta			Hymenoptera			PLATYGASTROIDEA	Scelionidae	Telenominae			Trissolcus						Ashmead, 1893	<p style="margin-left: 40px;"><i>ASOLCUS</i> Nakagawa, 1900</p><p style="margin-left: 40px;"><i>APHANURUS</i> Kieffer, 1912</p><p style="margin-left: 40px;"><i>IMMSIA</i> Cameron, 1912</p><p style="margin-left: 40px;"><i>MICROPHANURUS</i> Kieffer, 1926</p>
83419	Animalia		Arthropoda			Insecta			Hymenoptera			PLATYGASTROIDEA	Scelionidae	Telenominae			Trissolcus		arminon				(Walker, 1838)	<p style="margin-left: 40px;"><i>Telenomus arminon </i>Walker, 1838</p>							England		Fergusson (1983b)
83420	Animalia		Arthropoda			Insecta			Hymenoptera			PLATYGASTROIDEA	Scelionidae	Telenominae			Trissolcus		belenus				(Walker, 1836)	<p style="margin-left: 40px;"><i>Telenomus belenus </i>Walker, 1836</p>
83421	Animalia		Arthropoda			Insecta			Hymenoptera			PLATYGASTROIDEA	Scelionidae	Telenominae			Trissolcus		cultratus				(Mayr, 1879)	<p style="margin-left: 40px;"><i>Telenomus cultratus </i>Mayr, 1879</p><p style="margin-left: 40px;"><i>flavipes </i>misident.?</p>									Added by Talamas et al. (2015), although the Irish record of Trissolcus flavipes (Thomson, 1860, Telenomus) by O'Connor and Mineo (2007) probably refers to cultratus (Talamas et al. 2015).
83422	Animalia		Arthropoda			Insecta			Hymenoptera			PLATYGASTROIDEA	Scelionidae	Telenominae			Trissolcus		davatchii				(Javahery, 1968)	<p style="margin-left: 40px;"><i>Asolcus davatchii </i>Javahery, 1968</p>
83423	Animalia		Arthropoda			Insecta			Hymenoptera			PLATYGASTROIDEA	Scelionidae	Telenominae			Trissolcus		grandis				(Thomson, 1861)	<p style="margin-left: 40px;"><i>Telenomus grandis </i>Thomson, 1861</p><p style="margin-left: 40px;"><i>nigripes</i> (Thomson, 1861, <i>Telenomus</i>) </p><p style="margin-left: 40px;"><i>frontalis</i> (Thomson, 1861, <i>Telenomus</i>) </p><p style="margin-left: 40px;"><i>nigrita</i> (Thomson, 1861, <i>Telenomus</i>) </p><p style="margin-left: 40px;"><i>nixomartini</i> (Javahery, 1968, <i>Asolcu…							England, Ireland
83424	Animalia		Arthropoda			Insecta			Hymenoptera			PLATYGASTROIDEA	Scelionidae	Telenominae			Trissolcus		theste				(Walker, 1838)	<p style="margin-left: 40px;"><i>Telenomus theste </i>Walker, 1838</p>
83425	Animalia		Arthropoda			Insecta			Hymenoptera			PLATYGASTROIDEA	Scelionidae	Telenominae			Trissolcus		waloffae				(Javahery, 1968)	<p style="margin-left: 40px;"><i>Asolcus waloffae </i>Javahery, 1968</p>
83426	Animalia		Arthropoda			Insecta			Hymenoptera			PLATYGASTROIDEA	Sparasionidae										Dahlbom, 1858
83427	Animalia		Arthropoda			Insecta			Hymenoptera			PLATYGASTROIDEA	Sparasionidae				Sparasion						Latreille, 1802	<p style="margin-left: 40px;"><i>OXYURUS</i> Lamarck, 1817</p><p style="margin-left: 40px;"><i>BEBELUS</i> Gistel, 1848</p><p style="margin-left: 40px;"><i>PROSPARASION</i> Kieffer, 1913</p>
83428	Animalia		Arthropoda			Insecta			Hymenoptera			PLATYGASTROIDEA	Sparasionidae				Sparasion		cephalotes				Latreille, 1802	<p style="margin-left: 40px;"><i>frontalis</i> Latreille, 1805 </p>
